# Supplementary material for: Bevacizumab beyond Progression for Newly Diagnosed Glioblastoma (BIOMARK): Phase II Safety, Efficacy and Biomarker Study
Source: MDPI journal article supplement (doi:10.3390/cancers14225522), 2022-11-10
Supplement: s1 [file s1]

Figure S8

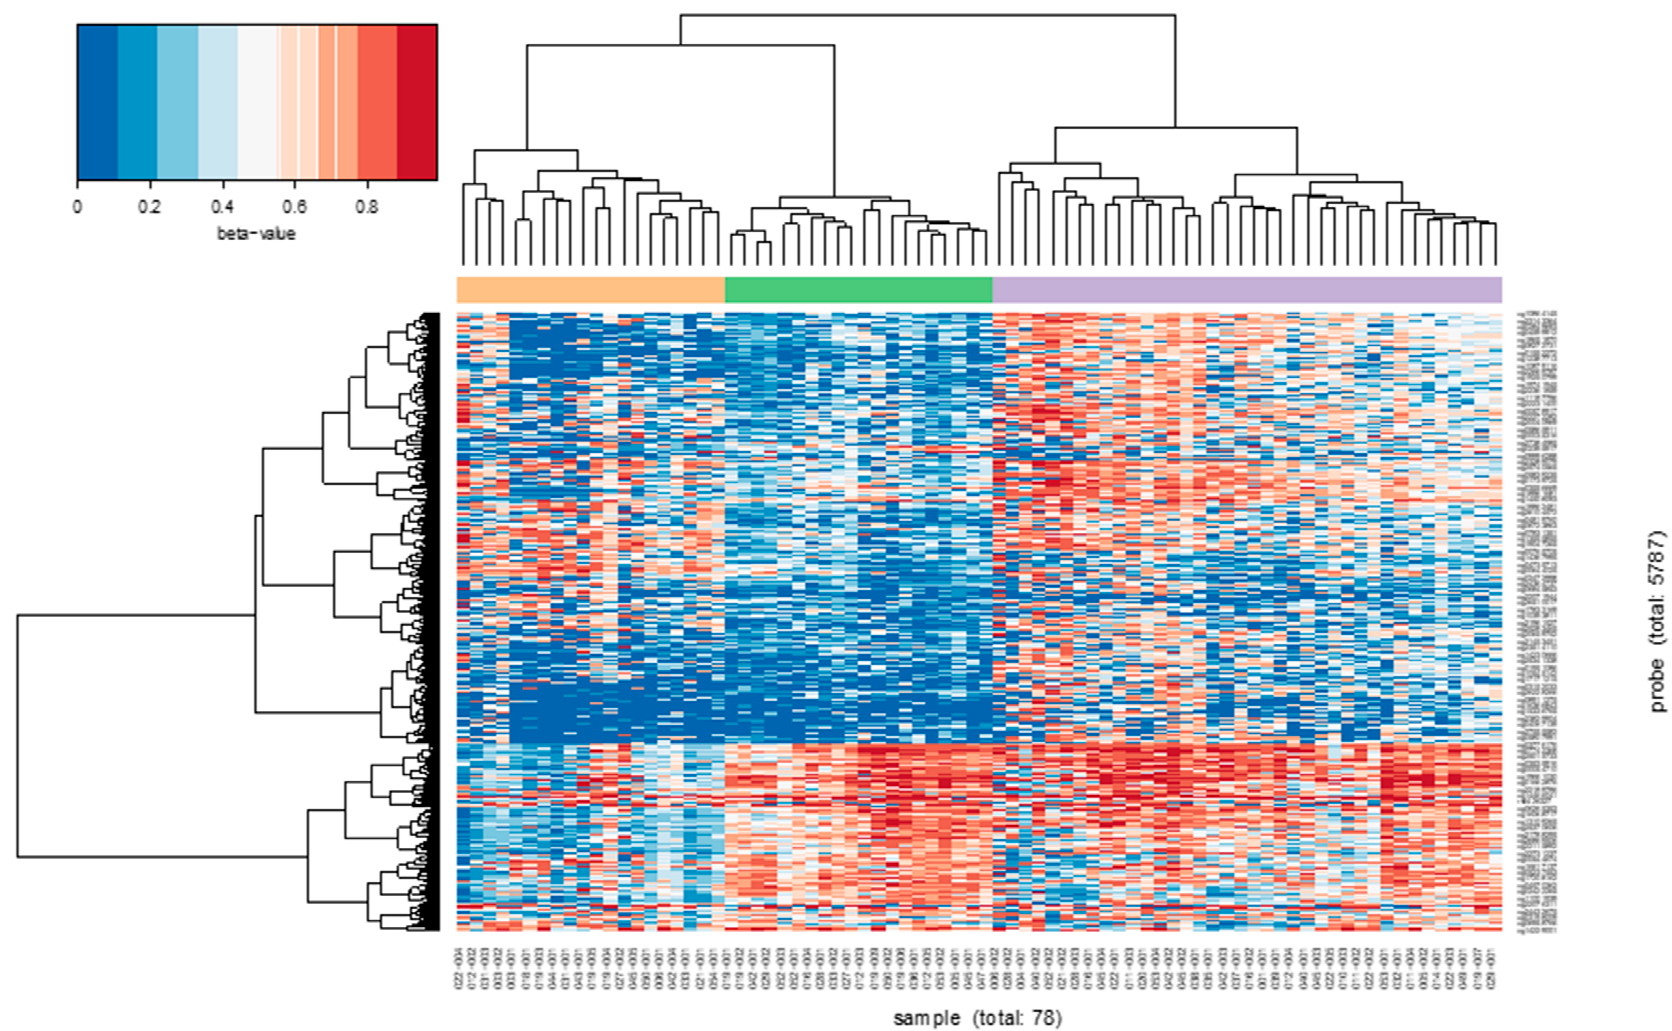

Hierarchical clustering and heatmap of DNA methylation beta-values from Priority 1 samples. After problematic probes were excluded, probes within the top highest 1% standard deviations among the samples were extracted and used for clustering. The clustering determined three methylation clusters of samples (green: stratum 1, purple: stratum 2, orange: stratum 3).
