# Supplementary material for: Bevacizumab beyond Progression for Newly Diagnosed Glioblastoma (BIOMARK): Phase II Safety, Efficacy and Biomarker Study
Source: MDPI journal article supplement (doi:10.3390/cancers14225522), 2022-11-10
Supplement: s1 [file s1]

**Figure S3**

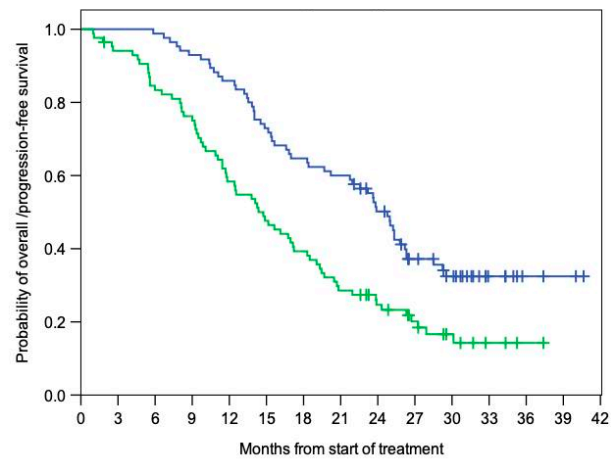

Median overall survival and progression-free survival in the full analysis set solely with isocitrate dehydrogenase 1 WT glioblastoma (n = 85).
