# Supplementary material for: Bevacizumab beyond Progression for Newly Diagnosed Glioblastoma (BIOMARK): Phase II Safety, Efficacy and Biomarker Study
Source: MDPI journal article supplement (doi:10.3390/cancers14225522), 2022-11-10
Supplement: s1 [file s1]

**Figure S6**

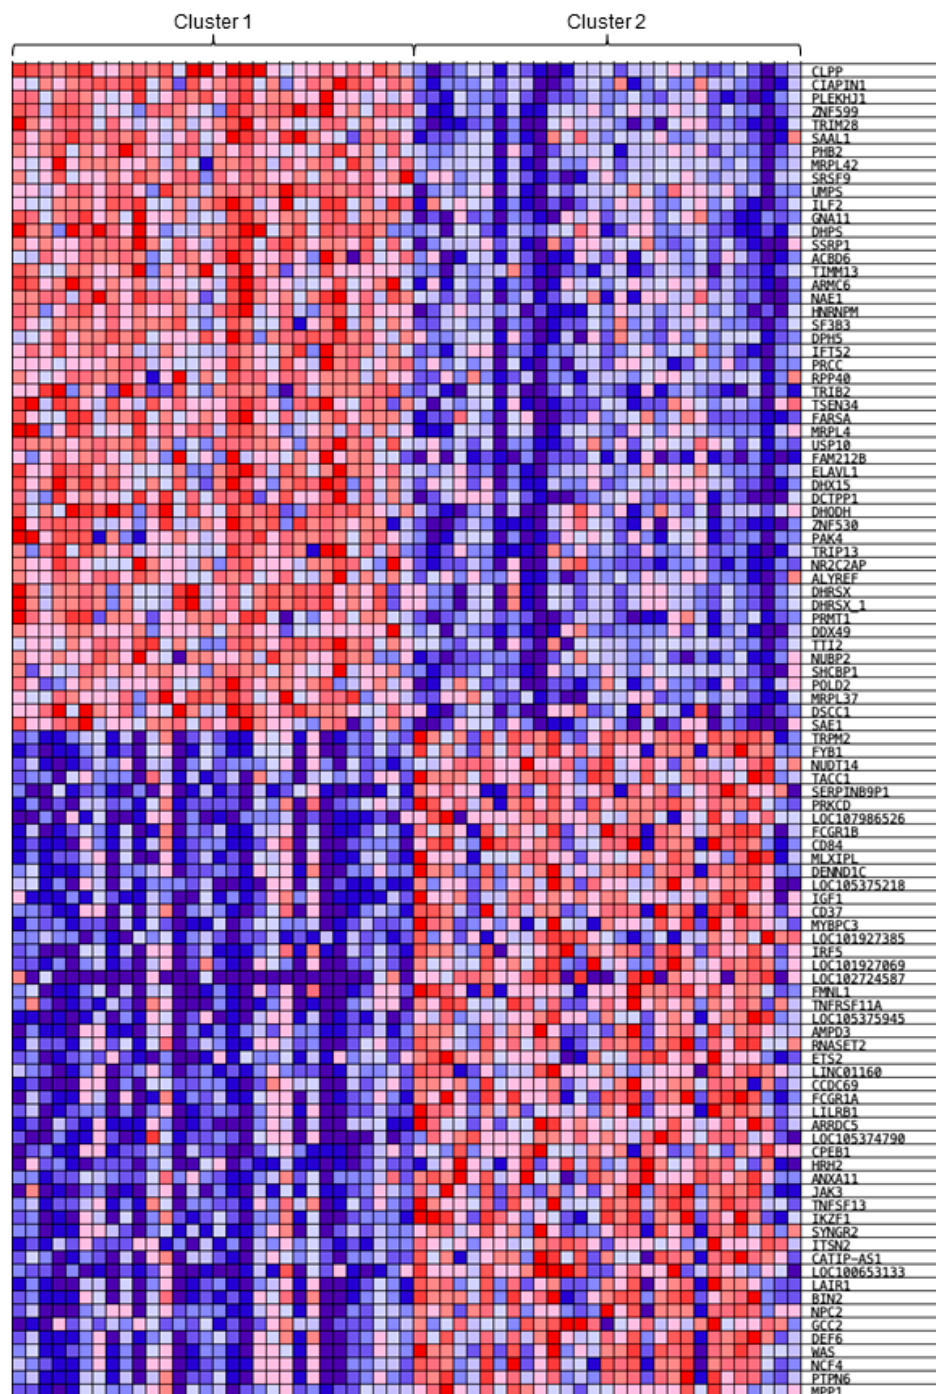

Heatmap of the top 50 features for each phenotype in Cluster 1 and Cluster 2 (Obtained through Gene Set Enrichment Analysis, <https://www.gsea-msigdb.org/gsea/index.jsp>).
