# Supplementary material for: Bevacizumab beyond Progression for Newly Diagnosed Glioblastoma (BIOMARK): Phase II Safety, Efficacy and Biomarker Study
Source: MDPI journal article supplement (doi:10.3390/cancers14225522), 2022-11-10
Supplement: s1 [file s1]

**Table S5.** Adverse events of special interest in patients treated with bevacizumab

| Adverse Events (%)                            | BIOMARK (N = 94) |          | AVAglio (N = 464) |          |
|-----------------------------------------------|------------------|----------|-------------------|----------|
|                                               | All grades       | Grade ≥3 | All grades        | Grade ≥3 |
| Bleeding                                      |                  |          |                   |          |
| Cerebral hemorrhage                           | 4.3              | 2.1      | 2.6               | 1.5      |
| Mucocutaneous bleeding                        | 10.6             | 0        | 26.7              | 0.4      |
| Other                                         | 0                | 0        | 11.6              | 0.6      |
| Wound-healing complications                   | 3.2              | 2.1      | 3.7               | 1.5      |
| Arterial thromboembolic events                | 7.4              | 1.1      | 5.0               | 4.1      |
| Venous thromboembolic events                  | 1.1              | 0        | 7.8               | 7.3      |
| Hypertension                                  | 42.6             | 29.8     | 37.5              | 10.3     |
| Proteinuria                                   | 29.8             | 1.1      | 14.0              | 3.7      |
| GI perforation (including GI fistula/abscess) | 1.1              | 1.1      | 1.7               | 1.1      |
| Abscesses and fistulae                        | 0                | 0        | 0.6               | 0.6      |
| Congestive heart failure                      | 0                | 0        | 0.4               | 0.4      |
| Posterior reversible encephalopathy syndrome  | 0                | 0        | —                 | —        |

Abbreviation: GI, gastrointestinal
