# Supplementary material for: Bevacizumab beyond Progression for Newly Diagnosed Glioblastoma (BIOMARK): Phase II Safety, Efficacy and Biomarker Study
Source: MDPI journal article supplement (doi:10.3390/cancers14225522), 2022-11-10
Supplement: s1 [file s1]

**Table S4.** *MGMT* promoter methylation status.

| <b><i>MGMT</i> methylation</b> | <b>Methylated</b> | <b>Unmethylated</b> |
|--------------------------------|-------------------|---------------------|
| FAS (n = 90)                   | 29 (32%)          | 61 (68%)            |
| BBP (n = 25)                   | 4 (16%)           | 21 (84%)            |
| ANP (n = 16)                   | 11 (69%)          | 5 (31%)             |

Abbreviations: ANP, Alive >2yrs with No Progression; BBP, bevacizumab beyond progression;

FAS, full analysis set; *MGMT*, *O*<sup>6</sup>-methylguanine-DNA methyltransferase

*P* = .001, Fisher's exact test
