# Supplementary material for: Bevacizumab beyond Progression for Newly Diagnosed Glioblastoma (BIOMARK): Phase II Safety, Efficacy and Biomarker Study
Source: MDPI journal article supplement (doi:10.3390/cancers14225522), 2022-11-10
Supplement: s1 [file s1]

Figure S9

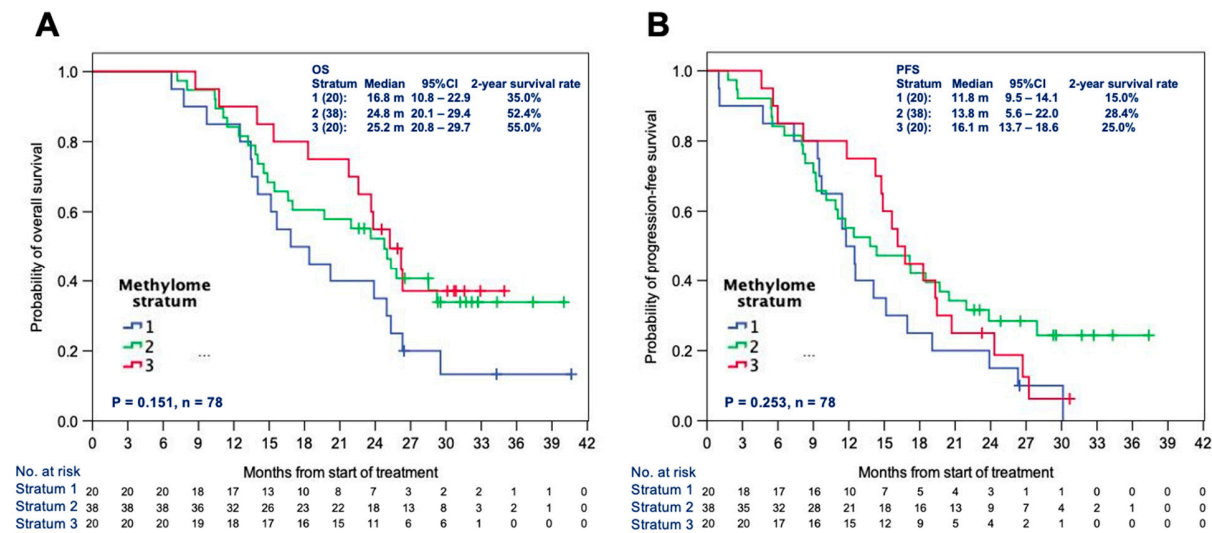

Overall survival (OS) (A) and progression-free survival (PFS) (B) stratified by methylome stratum (1, 2, and 3). Median values with 95% confidence intervals (CIs) and 2-year survival rates are indicated for each stratum.
