# Supplementary material for: Bevacizumab beyond Progression for Newly Diagnosed Glioblastoma (BIOMARK): Phase II Safety, Efficacy and Biomarker Study
Source: MDPI journal article supplement (doi:10.3390/cancers14225522), 2022-11-10
Supplement: s1 [file s1]

Figure S7

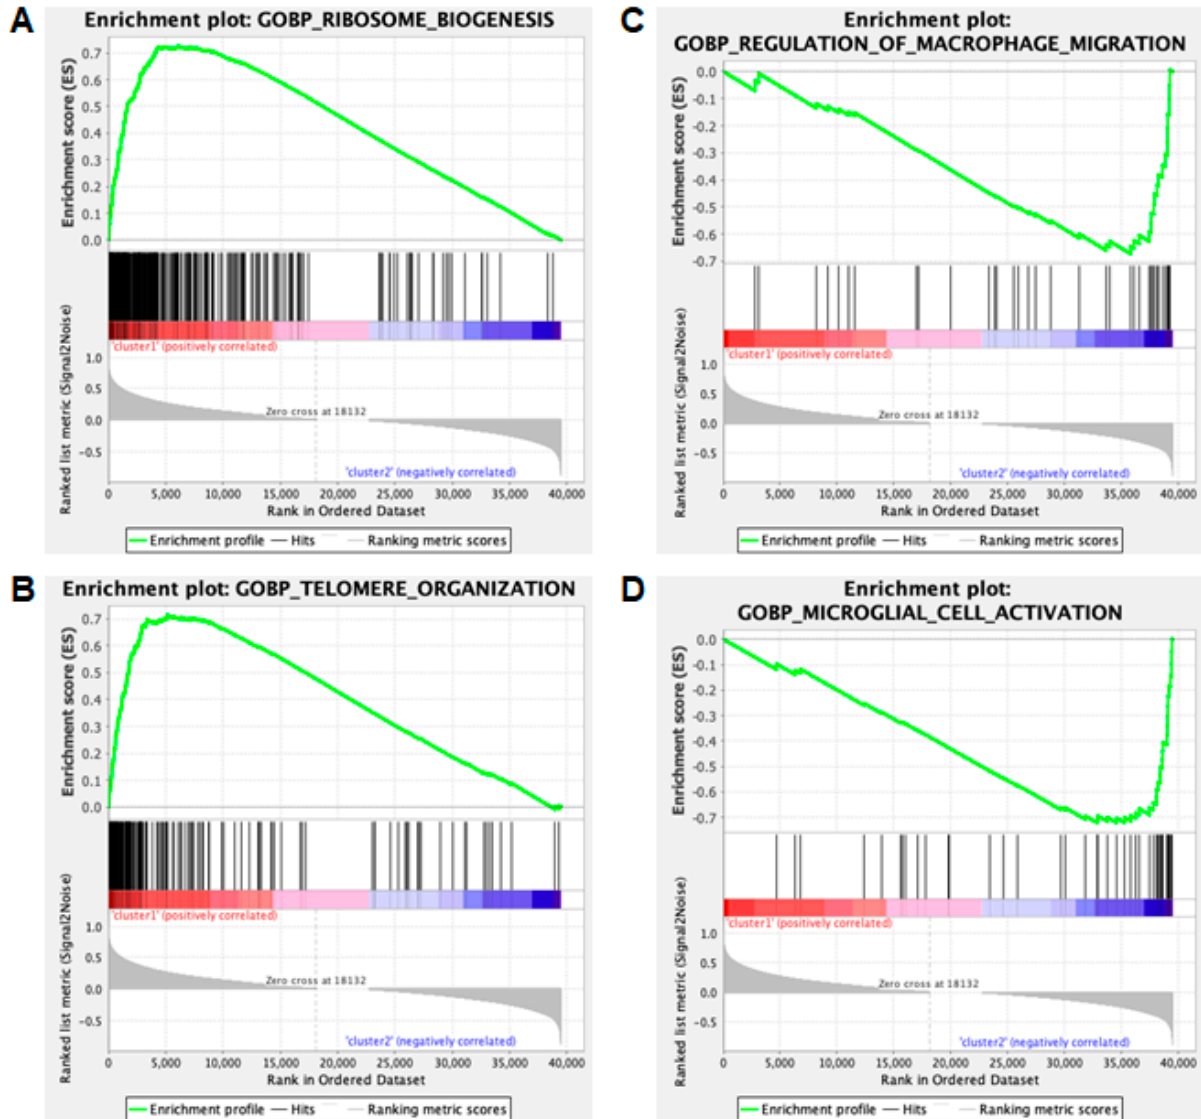

Gene Set Enrichment Analysis for genes up- or down-regulated in various Gene Ontology Biological Processes (Obtained through Gene Set Enrichment Analysis, <https://www.gsea-msigdb.org/gsea/index.jsp>). Enrichment plot for the Gene Set GOBP\_RIBOSOME\_BIOGENESIS enriched in Cluster 1 (A), the Gene Set GOBP\_TELOMERE\_ORGANIZATION, enriched in Cluster 1 (B), the Gene Set GOBP\_REGULATION\_OF\_MACROPHAGE\_MIGRATION, enriched in Cluster 2 (C) and the Gene Set GOBP\_MICROGLIAL\_CELL\_ACTIVATION, enriched in Cluster 2 (D), are shown.
