# Supplementary material for: Bevacizumab beyond Progression for Newly Diagnosed Glioblastoma (BIOMARK): Phase II Safety, Efficacy and Biomarker Study
Source: Cancers (Basel). 2022 Nov 10;14(22):5522. doi: 10.3390/cancers14225522 (PMC9688169; doi:10.3390/cancers14225522)
Supplement: Supplementary file 1 [file cancers-14-05522-s001.zip]

Archive with 22 entries (22 files):
- Nagane et al. Doc_S1_final.pdf
- Nagane et al. Fig S1_final.pdf
- Nagane et al. Fig S2_final.pdf
- Nagane et al. Fig S3_final.pdf
- Nagane et al. Fig S4_final-221113-1.pdf
- Nagane et al. Fig S5_final.pdf
- Nagane et al. Fig S6_final.pdf
- Nagane et al. Fig S7_final.pdf
- Nagane et al. Fig S8_final.pdf
- Nagane et al. Fig S9_final-221113.pdf
- Nagane et al. Table_S10_final.xlsx
- Nagane et al. Table_S11_final.xlsx
- Nagane et al. Table_S12_final.xlsx
- Nagane et al. Table_S1_final.xlsx
- Nagane et al. Table_S2_final.xlsx
- Nagane et al. Table_S3_final.xlsx
- Nagane et al. Table_S4_final.pdf
- Nagane et al. Table_S5_final.pdf
- Nagane et al. Table_S6_final.xlsx
- Nagane et al. Table_S7_final.xlsx
- Nagane et al. Table_S8_final.xlsx
- Nagane et al. Table_S9_final.xlsx
