# Supplementary material for: Bevacizumab beyond Progression for Newly Diagnosed Glioblastoma (BIOMARK): Phase II Safety, Efficacy and Biomarker Study
Source: Cancers (Basel). 2022 Nov 10;14(22):5522. doi: 10.3390/cancers14225522 (PMC9688169; doi:10.3390/cancers14225522)
Supplement: Supplementary file 1 [file cancers-14-05522-s001.zip › Nagane et al. Table_S1_final.xlsx]

## Sheet: Suppl Table S1
Table S1. Biomarker analysis summary
ID	BIO#	Cohort	Priority	Age	Sex	Central pathology review	Tumor cell contents	Outcome group	RNA seq		MGMT methylation	Mutation by pyrosequence		Mutation by Ion Torrent													Copy number by EPIC array														Pathway alteration			Copy number alteration by chromosomal arm (1, 1 copy loss; 1.5, partial loss; 2, normal; 2.5, partial gain; 3, 1 copy gain; loss/gain, mixture of loss and gain)
									Cluster 1/2	Nanostring		TERT	IDH1R132/ IDH2R172	BRAF	H3F3A	TP53	RB1	EGFR	PDGFRA	PIK3CA	PI3KR1	PI3KR2	NF1	PTEN	MTOR	Others	1p36 parial loss	Trisomy 7	Monosomy 10	Trisomy 19	Trisomy 20	MDM4 amp	PDGFRA amp	EGFR amp	MET amp	PTEN HD	CDKN2A HD	CDK4 amp	MDM2 amp	Other Amp	RB1 pathway (RB1 or CDKN2A or CDK4 or CCND1 or CDK6))	p53 pathway (TP53 or MDM2 or MDM4 or CDKN2A)	RTK/PI3K pathway (BRAF or EGFR or PDGFRA or PI3K or NF1 or PTEN or MTOR or FGFR or KIT or MET)	1p	1q	2p	2q	3p	3q
016-001	BIO#1	BIOMARK	1	56	M	GBM	0.947368	BBP	1	proliferative	1.3	c.-124C>T	WT					p.Arg324Leu									loss	Trisomy 7	Monosomy 10	Trisomy 19				amp			HD				RB1 pathway	p53 pathway	RTK/PI3K pathway	loss	wt	wt	wt	wt	wt
039-001	BIO#2	BIOMARK	1	66	F	GBM	0.95	BBP	1	mesenchymal	0.3	c.-124C>T	WT															Trisomy 7	Monosomy 10	Trisomy 19	Trisomy 20			amp			HD				RB1 pathway	p53 pathway		wt	loss	loss	wt	wt	wt
019-002	BIO#3	BIOMARK	1	72	F	GBM	0	C	nd	proliferative	7.3	WT	WT			p.Gly108Ser																										p53 pathway		wt	wt	wt	wt	wt	wt
045-001	BIO#4	BIOMARK	1	49	F	GBM	0.9	C	2	mesenchymal	0.9	c.-124C>T	WT													ATRX:p.Arg498Gly			Monosomy 10															wt	wt	wt	wt	wt	wt
019-003	BIO#5	BIOMARK	1	63	M	GBM	0	ANP	nd	proneural	23.4	WT	WT						p.Asn468Ser							SMARCB1:p.Ser129Asn		Trisomy 7									HD				RB1 pathway	p53 pathway	RTK/PI3K pathway	wt	wt	wt	wt	wt	wt
045-002	BIO#6	BIOMARK	1	75	M	GBM	1	ANP	nd	unclassified	31.6	c.-124C>T	WT				p.Asn924Ser			p.Val344Ala								Trisomy 7	Monosomy 10	Trisomy 19	Trisomy 20			amp			HD				RB1 pathway	p53 pathway	RTK/PI3K pathway	loss	wt	wt	wt	loss	loss
032-001	BIO#7	BIOMARK	1	74	F	GBM	0.8	BBP	nd	proliferative	1.7	c.-124C>T	WT						p.Ile472Ser			p.Pro4Ser	Splice site (c.6819+3A>G)	p.Tyr27Cys				Trisomy 7	Monosomy 10								HD				RB1 pathway	p53 pathway	RTK/PI3K pathway	wt	wt	wt	wt	wt	wt
019-004	BIO#9	BIOMARK	1	48	F	GBM	0.99	BBP	2	proneural	0.3	WT	WT			p.Ala189Val																	amp				HD	amp	amp		RB1 pathway	p53 pathway	RTK/PI3K pathway	wt	wt	wt	wt	wt	gain
011-002	BIO#11	BIOMARK	1	39	M	GBM	1	ANP	2	mesenchymal	26.2	c.-124C>T	WT			p.Glu11Gln								p.Gly165Glu				Trisomy 7	Monosomy 10		Trisomy 20											p53 pathway	RTK/PI3K pathway	gain	gain	wt	wt	gain	gain
019-005	BIO#12	BIOMARK	1	58	M	GBM	0.95	BBP	1	proneural	0.5	WT	WT						p.Cys290Arg														amp				HD	amp	amp	9p	RB1 pathway	p53 pathway	RTK/PI3K pathway	wt	wt	wt	wt	wt	wt
018-001	BIO#13	BIOMARK	1	31	M	GBM	0.9	ANP	1	proneural	1	WT	WT			p.Ser215Gly			p.Asn468Ser												Trisomy 20		amp									p53 pathway	RTK/PI3K pathway	wt	wt	wt	wt	loss	loss
036-001	BIO#14	BIOMARK	1	61	F	GBM	0.5	C	nd	mesenchymal	8.3	c.-146C>T	WT												p.Phe1888Leu																		RTK/PI3K pathway	wt	wt	wt	wt	wt	wt
019-006	BIO#15	BIOMARK	1	46	M	GBM	0.9	C	nd	unclassified	10.6	c.-124C>T	WT										p.Arg416Ter			PTPN11:p.Glu76Lys		Trisomy 7	Monosomy 10		Trisomy 20													wt	wt	wt	wt	wt	wt
042-002	BIO#16	BIOMARK	1	59	M	GBM	1	C	1	proliferative	0.2	c.-124C>T	WT															Trisomy 7	Monosomy 10	Trisomy 19	Trisomy 20			amp				amp	amp		RB1 pathway	p53 pathway	RTK/PI3K pathway	wt	wt	loss	loss	wt	wt
001-001	BIO#17	BIOMARK	1	64	M	GBM	0	BBP	1	proliferative	0.9	c.-124C>T	WT													FGFR1:p.Leu40Arg		Trisomy 7	Monosomy 10	Trisomy 19	Trisomy 20			amp			HD				RB1 pathway	p53 pathway	RTK/PI3K pathway	loss	wt	wt	wt	wt	wt
045-003	BIO#18	BIOMARK	1	75	F	GBM	0.95	BBP	1	proneural	0.3	c.-124C>T	WT			p.Phe134Leu												Trisomy 7	Monosomy 10		Trisomy 20					HD	HD				RB1 pathway	p53 pathway	RTK/PI3K pathway	wt	wt	wt	wt	wt	wt
012-002	BIO#19	BIOMARK	1	65	M	GBM	1	BBP	1	proneural	0	c.-146C>T	WT													CREBBP:p.Ala840Thr			Monosomy 10							HD	HD			CDK6	RB1 pathway	p53 pathway	RTK/PI3K pathway	wt	wt	loss	wt	wt	wt
022-001	BIO#20	BIOMARK	1	55	F	GBM	1	ANP	1	proliferative	5.3	c.-146C>T	WT														loss	Trisomy 7	Monosomy 10		Trisomy 20			amp			HD				RB1 pathway	p53 pathway	RTK/PI3K pathway	loss	loss	gain	gain	wt	wt
022-002	BIO#21	BIOMARK	1	59	M	GBM	0.888889	ANP	2	proneural	44.22	WT	WT			p.Glu258Ala								p.Cys105Arg				Trisomy 7						amp			HD				RB1 pathway	p53 pathway	RTK/PI3K pathway	gain	gain	wt	wt	gain	gain
022-003	BIO#22	BIOMARK	1	68	F	GBM	0.95	BBP	nd	mesenchymal	13.8	c.-124C>T	WT								p.Lys567Glu							Trisomy 7	Monosomy 10	Trisomy 19	Trisomy 20						HD				RB1 pathway	p53 pathway	RTK/PI3K pathway	wt	wt	wt	wt	wt	wt
052-001	BIO#23	BIOMARK	1	63	M	GBM	1	BBP	2	mesenchymal	0	c.-146C>T	WT			p.Thr125Pro		p.Ala289Val										Trisomy 7	Monosomy 10					amp				amp			RB1 pathway	p53 pathway	RTK/PI3K pathway	wt	wt	wt	wt	wt	wt
043-001	BIO#24	BIOMARK	1	60	F	GBM	1	C	1	proneural	63	WT	WT						p.Tyr555_Trp559del, p.His974Arg							FGFR1:p.Arg479Trp											HD				RB1 pathway	p53 pathway	RTK/PI3K pathway	loss	wt	wt	loss	wt	wt
027-001	BIO#25	BIOMARK	1	65	F	GBM	0.6	BBP	2	mesenchymal	0.7	c.-124C>T	WT														loss	Trisomy 7	Monosomy 10														RTK/PI3K pathway	loss	wt	wt	wt	wt	wt
040-001	BIO#26	BIOMARK	1	45	F	GBM	1	C	1	mesenchymal	38.6	c.-124C>T	WT				p.Pro820fs										loss		Monosomy 10							HD	HD				RB1 pathway	p53 pathway		loss	loss	wt	wt	wt	loss
012-003	BIO#27	BIOMARK	1	41	F	GBM	1	BBP	1	mesenchymal	5	c.-124C>T	WT			p.Gly154Val	p.Leu683Pro			p.His1047Arg								Trisomy 7		Trisomy 19	Trisomy 20										RB1 pathway	p53 pathway	RTK/PI3K pathway	gain	gain	wt	wt	gain	gain
006-001	BIO#28	BIOMARK	1	67	F	GBM	1	BBP	2	proneural	29.6	c.-124C>T	WT								Splice site (c.1746-1G>A)							Trisomy 7										amp		20q	RB1 pathway		RTK/PI3K pathway	wt	wt	wt	wt	wt	wt
006-002	BIO#29	BIOMARK	1	31	M	GBM	0.95	ANP	1	proliferative	0	c.-124C>T	WT																								HD				RB1 pathway	p53 pathway		wt	wt	wt	wt	wt	wt
016-004	BIO#31	BIOMARK	1	45	M	GBM	0.8	BBP	1	mesenchymal	30.2	c.-124C>T	WT										p.Arg1830Cys	p.Gln219Ter					Monosomy 10								HD				RB1 pathway	p53 pathway	RTK/PI3K pathway	wt	wt	wt	wt	wt	wt
016-002	BIO#32	BIOMARK	1	50	M	GBM	1	C	1	proneural	3.8	WT	WT			p.Trp146Cys								p.Arg130Ter			loss	Trisomy 7	Monosomy 10	Trisomy 19	Trisomy 20			amp			HD				RB1 pathway	p53 pathway	RTK/PI3K pathway	loss/gain	gain	wt	wt	wt	wt
019-007	BIO#34	BIOMARK	1	54	M	GBM	0.9	C	nd	mesenchymal	35.2	c.-124C>T	WT			p.Lys132Arg												Trisomy 7	Monosomy 10													p53 pathway		wt	wt	wt	wt	wt	wt
049-001	BIO#35	BIOMARK	1	40	M	GBM	0.9	C	2	mesenchymal	8.9	WT	WT			p.Gly245Ser												Trisomy 7	Monosomy 10					amp				amp			RB1 pathway	p53 pathway	RTK/PI3K pathway	wt	wt	wt	wt	wt	wt
019-001	BIO#36	BIOMARK	1	59	M	GBM	0.8	C	2	proneural	1	c.-146C>T	WT																Monosomy 10															wt	wt	wt	wt	wt	wt
042-001	BIO#37	BIOMARK	1	71	M	GBM	0.5	ANP	2	proneural	1.4	WT	WT			p.Glu11Gln																										p53 pathway		wt	wt	wt	wt	wt	wt
020-001	BIO#38	BIOMARK	1	68	F	GBM	1	ANP	2	proliferative	39.2	c.-146C>T	WT			p.Arg196Ter											loss	Trisomy 7	Monosomy 10													p53 pathway		loss	wt	wt	wt	gain	wt
021-001	BIO#40	BIOMARK	1	64	M	GBM	1	C	1	proneural	48.7	WT	WT													KIT:p.Asp910Tyr		Trisomy 7							amp		HD			MET	RB1 pathway	p53 pathway	RTK/PI3K pathway	loss	wt	wt	wt	gain	gain
021-002	BIO#41	BIOMARK	1	72	F	GBM	1	BBP	1	proliferative	19.3	c.-124C>T	WT					p.Ser227Phe									loss	Trisomy 7	Monosomy 10	Trisomy 19	Trisomy 20			amp			HD				RB1 pathway	p53 pathway	RTK/PI3K pathway	gain	gain	wt	wt	wt	wt
022-004	BIO#42	BIOMARK	1	62	F	GBM	0.95	ANP	1	proneural	77.6	c.-124C>T	WT													KIT:p.Val540Leu	loss	Trisomy 7		Trisomy 19				amp			HD				RB1 pathway	p53 pathway	RTK/PI3K pathway	loss	wt	wt	wt	wt	wt
045-004	BIO#44	BIOMARK	1	66	M	GBM	1	C	2	mesenchymal	0.4	WT	WT															Trisomy 7	Monosomy 10	Trisomy 19	Trisomy 20			amp			HD				RB1 pathway	p53 pathway	RTK/PI3K pathway	wt	wt	wt	wt	wt	wt
037-001	BIO#45	BIOMARK	1	72	M	GBM	0.916667	BBP	1	mesenchymal	0	c.-124C>T	WT										p.Lys1661fs	Splice site (c.493-1G>A)		PTPN11:p.Glu69Lys		Trisomy 7	Monosomy 10	Trisomy 19	Trisomy 20						HD				RB1 pathway	p53 pathway	RTK/PI3K pathway	wt	wt	wt	wt	wt	wt
045-005	BIO#46	BIOMARK	1	66	M	GBM	1	BBP	2	proneural	0	c.-124C>T	WT														loss		Monosomy 10							HD	HD				RB1 pathway	p53 pathway	RTK/PI3K pathway	loss	wt	wt	wt	wt	wt
004-001	BIO#47	BIOMARK	1	54	M	GBM	0.95	BBP	1	proliferative	0.4	c.-124C>T	WT															Trisomy 7	Monosomy 10			amp					HD	amp			RB1 pathway	p53 pathway	RTK/PI3K pathway	wt	wt	wt	wt	wt	wt
042-003	BIO#48	BIOMARK	1	42	F	GBM	1	ANP	nd	mesenchymal	49.7	c.-124C>T	WT						p.Met773Val							CREBBP:p.Asp1156del, KIT:p.Val540Leu		Trisomy 7	Monosomy 10	Trisomy 19	Trisomy 20			amp			HD				RB1 pathway	p53 pathway	RTK/PI3K pathway	wt	wt	wt	wt	wt	wt
014-001	BIO#49	BIOMARK	1	66	M	GBM	0.6	C	2	proneural	3.2	WT	WT															Trisomy 7	Monosomy 10					amp				amp			RB1 pathway		RTK/PI3K pathway	wt	wt	wt	wt	wt	wt
052-002	BIO#50	BIOMARK	1	54	M	GBM	1	BBP	nd	proliferative	0	c.-124C>T	WT															Trisomy 7		Trisomy 19	Trisomy 20	amp		amp								p53 pathway	RTK/PI3K pathway	wt	wt	wt	wt	wt	loss
040-002	BIO#51	BIOMARK	1	67	M	GBM	1	C	1	proliferative	0.5	c.-124C>T	WT											p.Ser170Asn					Monosomy 10														RTK/PI3K pathway	gain	gain	wt	wt	wt	wt
027-002	BIO#52	BIOMARK	1	67	F	GBM	1	C	1	proneural	4	c.-146C>T	WT								c.652G>T			p.Arg378fs			loss	Trisomy 7	Monosomy 10		Trisomy 20						HD				RB1 pathway	p53 pathway	RTK/PI3K pathway	loss	loss	wt	wt	wt	gain
053-001	BIO#53	BIOMARK	1	58	M	GBM	1	ANP	nd	mesenchymal	50.1	c.-124C>T	WT							p.His1047Arg								Trisomy 7		Trisomy 19	Trisomy 20						HD				RB1 pathway	p53 pathway	RTK/PI3K pathway	wt	wt	wt	wt	wt	wt
005-001	BIO#54	BIOMARK	1	72	F	GBM	0.888889	ANP	2	mesenchymal	5.2	c.-124C>T	WT			p.Met237Val								p.Tyr27Asp		MSH6:p.Tyr397Cys		Trisomy 7														p53 pathway	RTK/PI3K pathway	wt	wt	wt	wt	wt	wt
005-002	BIO#55	BIOMARK	1	68	M	GBM	1	C	nd	mesenchymal	1.1	c.-124C>T	WT										Splice site (c.1527+1G>A)					Trisomy 7	Monosomy 10								HD				RB1 pathway	p53 pathway	RTK/PI3K pathway	wt	wt	wt	wt	wt	wt
022-005	BIO#56	BIOMARK	1	70	M	GBM	0.947368	C	nd	mesenchymal	0.7	c.-124C>T	WT											p.Lys342Asn				Trisomy 7	Monosomy 10									amp	amp		RB1 pathway	p53 pathway	RTK/PI3K pathway	wt	wt	wt	wt	wt	wt
053-002	BIO#58	BIOMARK	1	54	F	GBM	0.5	C	nd	mesenchymal	1.2	c.-124C>T	WT																															wt	wt	wt	wt	wt	wt
019-009	BIO#60	BIOMARK	1	66	F	GBM	0.95	C	1	proliferative	0.3	c.-124C>T	WT			p.Glu11Gln								Splice site (c.1027-2A>G)			loss	Trisomy 7	Monosomy 10													p53 pathway	RTK/PI3K pathway	loss	wt	wt	wt	wt	wt
054-001	BIO#61	BIOMARK	1	69	M	GBM	0.8	ANP	2	proneural	32.4	WT	WT			p.Lys132Arg			p.Arg1039fs							MSH6:p.Arg300Pro							amp				HD			12p	RB1 pathway	p53 pathway	RTK/PI3K pathway	wt	gain	gain	wt	gain	wt
010-003	BIO#62	BIOMARK	1	49	M	GBM	1	BBP	2	mesenchymal	0	c.-124C>T	WT			p.Pro177_Cys182del								p.Lys6Glu					Monosomy 10													p53 pathway	RTK/PI3K pathway	wt	wt	wt	wt	wt	wt
029-001	BIO#63	BIOMARK	1	50	M	GBM	0.8	BBP	2	proneural	26.2	c.-124C>T	WT			p.Tyr220Cys								p.Phe341Val		KIT:p.Asp52Asn		Trisomy 7	Monosomy 10								HD				RB1 pathway	p53 pathway	RTK/PI3K pathway	wt	wt	wt	wt	wt	wt
042-004	BIO#64	BIOMARK	1	46	M	GBM	0.95	C	2	proneural	13.5	c.-124C>T	WT											p.Asp24His				Trisomy 7						amp			HD				RB1 pathway	p53 pathway	RTK/PI3K pathway	loss	wt	wt	wt	wt	gain
052-003	BIO#65	BIOMARK	1	60	F	GBM	0.95	C	2	mesenchymal	18.9	c.-124C>T	WT															Trisomy 7		Trisomy 19							HD				RB1 pathway	p53 pathway		wt	wt	wt	wt	gain	gain
047-001	BIO#66	BIOMARK	1	45	M	GBM	0.916667	BBP	2	mesenchymal	0.3	c.-124C>T	WT								p.Leu573_Lys575delinsGln		p.Phe1247fs			SMARCA4, BRAF D594G			Monosomy 10	Trisomy 19													RTK/PI3K pathway	wt	wt	wt	wt	wt	wt
053-004	BIO#67	BIOMARK	1	74	F	GBM	1	C	1	proliferative	54.8	c.-146C>T	WT														loss	Trisomy 7	Monosomy 10		Trisomy 20			amp			HD				RB1 pathway	p53 pathway	RTK/PI3K pathway	loss	gain	wt	gain	wt	wt
044-001	BIO#68	BIOMARK	1	71	M	GBM	1	C	1	proneural	1.6	WT	WT			p.Glu286Lys																						amp		CCND1	RB1 pathway	p53 pathway		wt	wt	loss	wt	loss	loss
012-004	BIO#69	BIOMARK	1	71	F	GBM	0	C	1	proliferative	0	c.-124C>T	WT														loss/gain	Trisomy 7	Monosomy 10							HD							RTK/PI3K pathway	loss/gain	wt	wt	wt	loss/gain	gain
012-005	BIO#70	BIOMARK	1	35	F	GBM	1	BBP	nd	mesenchymal	0	c.-124C>T	WT																															wt	wt	wt	wt	wt	wt
003-001	BIO#71	BIOMARK	1	22	F	GBM	0.5	BBP	2	proneural	0	WT	WT			p.Arg158Gly							p.Cys2371Ter			KIT:p.Val540Leu									amp					3p, MET		p53 pathway	RTK/PI3K pathway	wt	wt	wt	wt	wt	wt
003-002	BIO#72	BIOMARK	1	67	M	GBM	1	ANP	2	mesenchymal	51.6	c.-124C>T	WT			p.Trp146Ter												Trisomy 7	Monosomy 10						amp		HD				RB1 pathway	p53 pathway	RTK/PI3K pathway	wt	wt	wt	wt	wt	wt
050-001	BIO#73	BIOMARK	1	53	M	GBM	0.888889	ANP	2	proneural	36.3	c.-146C>T	WT						p.Gly286Arg														amp			HD	HD				RB1 pathway	p53 pathway	RTK/PI3K pathway	loss	wt	wt	wt	gain	gain
033-002	BIO#74	BIOMARK	1	58	F	GBM	0.9	BBP	2	mesenchymal	0	c.-124C>T	WT			p.Thr253Ala													Monosomy 10													p53 pathway		wt	wt	wt	wt	wt	wt
033-001	BIO#75	BIOMARK	1	56	M	GBM	0.8	C	1	proneural	0.7	c.-124C>T	WT																Monosomy 10						amp		HD			MET	RB1 pathway	p53 pathway	RTK/PI3K pathway	loss	wt	wt	wt	gain	gain
038-001	BIO#76	BIOMARK	1	63	M	GBM	0.9	BBP	1	mesenchymal	0.4	c.-124C>T	WT													SMARCA4:p.Phe975Leu	loss	Trisomy 7	Monosomy 10	Trisomy 19				amp		HD	HD				RB1 pathway	p53 pathway	RTK/PI3K pathway	loss	loss	wt	wt	wt	wt
050-002	BIO#80	BIOMARK	1	54	M	GBM	1	C	2	mesenchymal	1.4	c.-124C>T	WT	V600E														Trisomy 7	Monosomy 10								HD				RB1 pathway	p53 pathway		wt	wt	wt	wt	wt	wt
031-001	BIO#82	BIOMARK	1	63	F	GBM	0.95	ANP	1	proneural	0	WT	WT			p.Arg306Ter			p.Arg979Cys	p.Lys111del						SMARCA4:p.Glu1211del																p53 pathway	RTK/PI3K pathway	loss	wt	wt	loss	gain	gain
031-003	BIO#84	BIOMARK	1	54	M	GBM	1	C	1	mesenchymal	0	c.-124C>T	WT			p.Thr155Ile												Trisomy 7	Monosomy 10									amp			RB1 pathway	p53 pathway		wt	gain	wt	wt	wt	wt
029-002	BIO#96	BIOMARK	1	70	F	GBM	0.5	C	2	proneural	0.7	c.-124C>T	WT																															wt	wt	wt	wt	wt	wt
011-003	BIO#97	BIOMARK	1	65	M	GBM	0.916667	ANP	2	mesenchymal	4.5	c.-124C>T	WT											p.Met134Val				Trisomy 7	Monosomy 10					amp			HD			6p	RB1 pathway	p53 pathway	RTK/PI3K pathway	wt	wt	gain	gain	wt	wt
011-004	BIO#98	BIOMARK	1	52	F	GBM	0.947368	ANP	2	proliferative	12.2	c.-124C>T	WT			p.Cys176Trp												Trisomy 7	Monosomy 10													p53 pathway		wt	wt	wt	gain	wt	wt
035-001	BIO#103	BIOMARK	1	64	M	GBM	0.95	ANP	nd	proliferative	0	c.-124C>T	WT					p.Gly598Val, p.Arg108Lys									loss	Trisomy 7	Monosomy 10	Trisomy 19	Trisomy 20			amp			HD				RB1 pathway	p53 pathway	RTK/PI3K pathway	loss	wt	wt	wt	wt	wt
028-001	BIO#107	BIOMARK	1	47	M	GBM	0	C	nd	nd	0	c.-124C>T	WT					p.Val774Met|		p.Ala1035Val						CREBBP:p.Met2053Val, KIT:p.Thr304Ala		Trisomy 7	Monosomy 10														RTK/PI3K pathway	wt	wt	wt	wt	wt	wt
028-002	BIO#108	BIOMARK	1	58	M	GBM	0.95	ANP	nd	unclassified	57.7	c.-146C>T	WT					p.Ala289Val								FGFR1:p.Val135Ile		Trisomy 7	Monosomy 10			amp					HD			2q	RB1 pathway	p53 pathway	RTK/PI3K pathway	wt	loss	wt	wt	wt	wt
028-003	BIO#109	BIOMARK	1	63	M	GBM	0	ANP	nd	nd	59.9	WT	WT			p.Glu11Gln		p.Ala289Val, p.Gly598Val			Splice site (c.1746-2A>G)						loss	Trisomy 7	Monosomy 10	Trisomy 19	Trisomy 20			amp			HD				RB1 pathway	p53 pathway	RTK/PI3K pathway	loss	wt	wt	wt	wt	wt
012-001	BIO#8	BIOMARK	2	68	M	GBM	0	ANP	nd	proneural	0.4	WT	WT							p.His1047Leu						FGFR1:p.Asn577Lys, ATRX:p.Asn1370fs																	RTK/PI3K pathway	wt	gain	wt	wt	loss/gain	loss
048-001	BIO#10	BIOMARK	2	33	F	GBM	1	C	nd	mesenchymal	1.3	WT	WT	V600E																							HD				RB1 pathway	p53 pathway	RTK/PI3K pathway	wt	wt	wt	wt	loss	gain
016-003	BIO#33	BIOMARK	2	32	M	GBM	0.875	BBP	nd	proliferative	58	WT	WT		G34R									p.Arg130Ter		ATRX:p.Arg808Ter		Trisomy 7			Trisomy 20			amp						MYC			RTK/PI3K pathway	wt	wt	wt	wt	loss	wt
010-001	BIO#57	BIOMARK	2	28	F	GBM	0.95	ANP	nd	proneural	26.6	WT	WT																															wt	wt	wt	wt	wt	wt
053-003	BIO#59	BIOMARK	2	73	M	GBM	1	ANP	nd	mesenchymal	14.3	WT	WT			Splice site (c.560-1G>T)						p.Pro4Ser	p.Leu549Arg					Trisomy 7									HD				RB1 pathway	p53 pathway	RTK/PI3K pathway	wt	wt	wt	wt	wt	wt
031-002	BIO#83	BIOMARK	2	38	F	GBM	0.95	ANP	nd	mesenchymal	2.8	WT	WT														loss										HD				RB1 pathway	p53 pathway		loss	wt	loss/gain	loss	loss/gain	wt
055-001	BIO#113	BIOMARK	2	54	M	GBM	0.947368	ANP	nd	mesenchymal	47	WT	WT																Monosomy 10								HD				RB1 pathway	p53 pathway		wt	wt	wt	wt	wt	wt
019-C	BIO#89	AVAGlio	1	58	F	GBM	0.875	na	2	mesenchymal	19.7	c.-124C>T	WT					p.Gln787Lys|						p.Lys342Asn	p.Val726Ala			Trisomy 7	Monosomy 10	Trisomy 19													RTK/PI3K pathway	wt	wt	wt	wt	wt	wt
019-D	BIO#90	AVAGlio	1	41	F	GBM	0.95	na	1	mesenchymal	2.6	c.-124C>T	WT			p.Tyr163Cys								p.Asp252Gly				Trisomy 7	Monosomy 10													p53 pathway	RTK/PI3K pathway	gain	gain	wt	wt	wt	wt
019-F	BIO#92	AVAGlio	1	50	F	GBM	0.95	na	1	proneural	0.3	c.-146C>T	WT			p.Arg248Gln								p.Ser10Asn					Monosomy 10					amp				amp			RB1 pathway	p53 pathway	RTK/PI3K pathway	wt	wt	wt	wt	wt	wt
019-G	BIO#93	AVAGlio	1	72	M	GBM	0.9	na	1	proneural	56.4	c.-124C>T	WT			p.Glu271Lys							p.Leu380Arg	p.Leu108Arg		CREBBP:p.Ala1003Ter			Monosomy 10								HD				RB1 pathway	p53 pathway	RTK/PI3K pathway	gain	loss/gain	wt	wt	gain	gain
019-H	BIO#94	AVAGlio	1	66	M	GBM	1	na	2	mesenchymal	0	c.-124C>T	WT	I326V										p.Asp92Gly																			RTK/PI3K pathway	wt	wt	wt	wt	wt	wt
019-I	BIO#95	AVAGlio	1	55	F	GBM	0.7	na	1	proliferative	0	WT	WT			p.Arg342Pro																		amp								p53 pathway	RTK/PI3K pathway	wt	wt	wt	wt	wt	wt
045-A	BIO#99	AVAGlio	1	68	F	GBM	0.95	na	1	proneural	41.4	WT	WT															Trisomy 7	Monosomy 10						amp	HD	HD				RB1 pathway	p53 pathway	RTK/PI3K pathway	loss	wt	wt	wt	wt	wt
045-B	BIO#100	AVAGlio	1	69	M	GBM	0.9	na	2	mesenchymal	0.9	c.-124C>T	WT					p.Thr263Pro						p.Met134Thr					Monosomy 10		Trisomy 20			amp			HD				RB1 pathway	p53 pathway	RTK/PI3K pathway	wt	wt	wt	wt	wt	wt
045-C	BIO#101	AVAGlio	1	47	F	GBM	0.9	na	1	proliferative	29.1	c.-124C>T	WT			p.Arg249Gly													Monosomy 10													p53 pathway		gain	gain	wt	wt	wt	wt
045-D	BIO#102	AVAGlio	1	55	F	GBM	1	na	2	mesenchymal	0	c.-146C>T	WT			p.Val173Leu			p.Val544Ala									Trisomy 7	Monosomy 10							HD						p53 pathway	RTK/PI3K pathway	wt	wt	wt	wt	wt	wt
039-B	BIO#104	AVAGlio	1	66	F	GBM	0.05	na	nd	proneural	6.5	c.-124C>T	WT			p.Gly266Arg		p.Pro596Ala					p.Gln2002Ter	p.Ser179Ile				Trisomy 7	Monosomy 10				amp					amp		TERT	RB1 pathway	p53 pathway	RTK/PI3K pathway	wt	wt	wt	wt	wt	wt
039-C	BIO#105	AVAGlio	1	68	F	GBM	0.7	na	nd	proneural	50.7	WT	WT							p.Arg115Pro			p.Ile1820fs				loss						amp							4q, 16q, 20q			RTK/PI3K pathway	loss	loss/gain	gain	gain	wt	wt
012-C	BIO#110	AVAGlio	1	73	M	GBM	0.875	na	2	mesenchymal	2.9	c.-124C>T	WT														loss	Trisomy 7	Monosomy 10					amp			HD				RB1 pathway	p53 pathway	RTK/PI3K pathway	loss	wt	wt	wt	wt	wt
012-B	BIO#111	AVAGlio	1	57	M	GBM	0.8	na	1	proneural	0	WT	WT			p.Arg175His			p.Cys235Arg										Monosomy 10				amp				HD				RB1 pathway	p53 pathway	RTK/PI3K pathway	wt	wt	wt	wt	loss	loss
012-A	BIO#112	AVAGlio	1	64	M	GBM	0.888889	na	1	mesenchymal	25.7	c.-124C>T	WT							p.Gln546Lys			p.Lys583Arg				loss	Trisomy 7	Monosomy 10		Trisomy 20						HD				RB1 pathway	p53 pathway	RTK/PI3K pathway	loss	wt	wt	wt	wt	wt
019-E	BIO#91	AVAGlio	2	63	M	GBM	0.9	na	nd	mesenchymal	0	WT	WT										p.Glu1832fs						Monosomy 10								HD				RB1 pathway	p53 pathway	RTK/PI3K pathway	wt	wt	wt	wt	wt	wt
[truncated: 37 more columns]
