# Supplementary material for: Bevacizumab beyond Progression for Newly Diagnosed Glioblastoma (BIOMARK): Phase II Safety, Efficacy and Biomarker Study
Source: Cancers (Basel). 2022 Nov 10;14(22):5522. doi: 10.3390/cancers14225522 (PMC9688169; doi:10.3390/cancers14225522)
Supplement: Supplementary file 1 [file cancers-14-05522-s001.zip › Nagane et al. Table_S2_final.xlsx]

## Sheet: Supple Table S2
Table S2. Target and control genes for the NanoString analysis
Genes	Target/Control
CSDC2	Target
KLRC3	Target
DLL3	Target
FERMT	Target
GALNT13	Target
NCAM1	Target
RASL10A	Target
SNAP91	Target
NDRG2	Target
SOX8	Target
ATP6V1G2	Target
GABBR1	Target
SCG3	Target
ANGPTL4	Target
CHI3L1	Target
COL4A1	Target
COL4A2	Target
FOSL2	Target
LIF	Target
MYL9	Target
PDLIM4	Target
PDPN	Target
PLA2G5	Target
SERPINE1	Target
SPOCD1	Target
TAGLN	Target
TIMP1	Target
CENPK	Target
DTL	Target
E2F7	Target
HMMR	Target
B2M	Control
GUSB	Control
CLTC	Control
TUBB	Control
RPLP0	Control
GAPDH	Control
LDHA	Control
POLR2A	Control
TBP	Control
