# Supplementary material for: Bevacizumab beyond Progression for Newly Diagnosed Glioblastoma (BIOMARK): Phase II Safety, Efficacy and Biomarker Study
Source: Cancers (Basel). 2022 Nov 10;14(22):5522. doi: 10.3390/cancers14225522 (PMC9688169; doi:10.3390/cancers14225522)
Supplement: Supplementary file 1 [file cancers-14-05522-s001.zip › Nagane et al. Table_S3_final.xlsx]

## Sheet: Table S3
	Table S3
	Chemotherapeutic agent combined with BBP (N = 25)
	Drug	No of patients*
	Temozolomide	12
	Nimustine	2
	None	12
	*Temozolomide and nimustine were used separately in one patient
	Abbreviation: BBP, bevacizumab beyond progression
