# Supplementary material for: Bevacizumab beyond Progression for Newly Diagnosed Glioblastoma (BIOMARK): Phase II Safety, Efficacy and Biomarker Study
Source: Cancers (Basel). 2022 Nov 10;14(22):5522. doi: 10.3390/cancers14225522 (PMC9688169; doi:10.3390/cancers14225522)
Supplement: Supplementary file 1 [file cancers-14-05522-s001.zip › Nagane et al. Table_S6_final.xlsx]

## Sheet: Supple Table S5
Table S6. Top 50 genes from the Gene Ontology Biological Process Gene sets enriched in Cluster 1 (Molecular Signatures Database v7.4, C5, BP subset)
GS follow link to MSigDB	SIZE	ES	NES	NOM p-val	FDR q-val	FWER p-val	RANK AT MAX	LEADING EDGE
GOBP_NCRNA_PROCESSING	390	0.717523	2.18169	0	0	0	6155	tags=62%, list=16%, signal=72%
GOBP_NCRNA_METABOLIC_PROCESS	465	0.696236	2.17193	0	0	0	7229	tags=63%, list=18%, signal=77%
GOBP_RIBOSOMAL_SMALL_SUBUNIT_BIOGENESIS	72	0.805815	2.14512	0	0	0	4312	tags=69%, list=11%, signal=78%
GOBP_RIBONUCLEOPROTEIN_COMPLEX_BIOGENESIS	459	0.697138	2.14434	0	0	0	7224	tags=64%, list=18%, signal=77%
GOBP_MATURATION_OF_SSU_RRNA	48	0.838235	2.13654	0	0	0	4312	tags=75%, list=11%, signal=84%
GOBP_RRNA_METABOLIC_PROCESS	234	0.722298	2.13484	0	0	0	6079	tags=62%, list=15%, signal=73%
GOBP_RIBONUCLEOPROTEIN_COMPLEX_SUBUNIT_ORGANIZATION	222	0.665035	2.13174	0	0	0	5081	tags=51%, list=13%, signal=58%
GOBP_RIBOSOME_BIOGENESIS	299	0.725535	2.12165	0	0	0	6112	tags=65%, list=15%, signal=76%
GOBP_POSITIVE_REGULATION_OF_VIRAL_TRANSCRIPTION	26	0.817153	2.11373	0	0.000199445	0.002	4122	tags=65%, list=10%, signal=73%
GOBP_MITOCHONDRIAL_TRANSLATION	132	0.743737	2.0801	0	0.000775971	0.009	7045	tags=71%, list=18%, signal=86%
GOBP_TRNA_METABOLIC_PROCESS	159	0.725385	2.07348	0	0.000914434	0.01	6155	tags=64%, list=16%, signal=75%
GOBP_TRNA_PROCESSING	126	0.728296	2.05937	0	0.00107598	0.013	6155	tags=64%, list=16%, signal=76%
GOBP_RRNA_TRANSCRIPTION	29	0.794968	2.05692	0	0.000993209	0.013	3532	tags=62%, list=9%, signal=68%
GOBP_TRANSCRIPTION_COUPLED_NUCLEOTIDE_EXCISION_REPAIR	73	0.728376	2.05679	0	0.000922266	0.013	5273	tags=64%, list=13%, signal=74%
GOBP_TRANSLATIONAL_ELONGATION	132	0.687517	2.05079	0	0.000942326	0.013	7021	tags=65%, list=18%, signal=79%
GOBP_NUCLEOTIDE_EXCISION_REPAIR	107	0.701862	2.04872	0	0.000928191	0.014	5288	tags=61%, list=13%, signal=70%
GOBP_DNA_TEMPLATED_TRANSCRIPTION_ELONGATION	112	0.694721	2.04858	0	0.000873592	0.014	5470	tags=55%, list=14%, signal=64%
GOBP_TELOMERE_ORGANIZATION	145	0.714138	2.0456	0	0.000825059	0.014	5158	tags=61%, list=13%, signal=70%
GOBP_NCRNA_TRANSCRIPTION	105	0.69793	2.04412	0	0.000815437	0.015	7055	tags=66%, list=18%, signal=80%
GOBP_MITOCHONDRIAL_GENE_EXPRESSION	161	0.719198	2.04142	0	0.000803257	0.015	7175	tags=68%, list=18%, signal=82%
GOBP_MATURATION_OF_SSU_RRNA_FROM_TRICISTRONIC_RRNA_TRANSCRIPT_SSU_RRNA_5_8S_RRNA_LSU_RRNA	35	0.822058	2.03882	0	0.00083095	0.017	4312	tags=71%, list=11%, signal=80%
GOBP_TRANSCRIPTION_INITIATION_FROM_RNA_POLYMERASE_I_PROMOTER	35	0.747544	2.03347	0	0.000898893	0.018	3544	tags=57%, list=9%, signal=63%
GOBP_TELOMERE_MAINTENANCE_VIA_TELOMERE_LENGTHENING	79	0.702039	2.0324	0	0.000859811	0.018	7359	tags=63%, list=19%, signal=78%
GOBP_NUCLEOTIDE_EXCISION_REPAIR_DNA_INCISION	39	0.730767	2.02974	0	0.000903938	0.019	3935	tags=64%, list=10%, signal=71%
GOBP_TERMINATION_OF_RNA_POLYMERASE_I_TRANSCRIPTION	28	0.757474	2.02918	0	0.00089882	0.019	3544	tags=57%, list=9%, signal=63%
GOBP_RNA_CATABOLIC_PROCESS	405	0.613717	2.0261	0	0.000947609	0.02	7514	tags=60%, list=19%, signal=73%
GOBP_REGULATION_OF_TELOMERE_MAINTENANCE	78	0.712935	2.02563	0	0.000912512	0.02	7359	tags=67%, list=19%, signal=82%
GOBP_SNRNA_METABOLIC_PROCESS	47	0.709028	2.02391	0	0.00090693	0.021	7022	tags=64%, list=18%, signal=78%
GOBP_SPLICEOSOMAL_SNRNP_ASSEMBLY	51	0.759993	2.01442	0	0.00121482	0.031	4272	tags=55%, list=11%, signal=61%
GOBP_PROTEIN_DNA_COMPLEX_SUBUNIT_ORGANIZATION	208	0.674318	2.01371	0	0.00117432	0.031	8009	tags=66%, list=20%, signal=82%
GOBP_DNA_TEMPLATED_TRANSCRIPTION_TERMINATION	72	0.73033	2.01253	0	0.00119582	0.031	7232	tags=71%, list=18%, signal=87%
GOBP_MATURATION_OF_5_8S_RRNA_FROM_TRICISTRONIC_RRNA_TRANSCRIPT_SSU_RRNA_5_8S_RRNA_LSU_RRNA	24	0.843557	2.01176	0	0.00115845	0.031	6041	tags=92%, list=15%, signal=108%
GOBP_REGULATION_OF_VIRAL_TRANSCRIPTION	42	0.68727	2.011	0	0.00116624	0.033	4122	tags=48%, list=10%, signal=53%
GOBP_RNA_DEPENDENT_DNA_BIOSYNTHETIC_PROCESS	69	0.693738	2.0089	0	0.00113194	0.033	6411	tags=59%, list=16%, signal=71%
GOBP_TRNA_MODIFICATION	87	0.723667	2.00353	0	0.00111741	0.033	6416	tags=62%, list=16%, signal=74%
GOBP_MATURATION_OF_5_8S_RRNA	35	0.791678	1.99925	0	0.00123048	0.037	6041	tags=80%, list=15%, signal=94%
GOBP_NUCLEOTIDE_EXCISION_REPAIR_DNA_GAP_FILLING	23	0.793777	1.9984	0	0.00121975	0.037	3361	tags=78%, list=9%, signal=85%
GOBP_POSITIVE_REGULATION_OF_TELOMERE_MAINTENANCE	51	0.712325	1.99534	0	0.00128833	0.041	5727	tags=61%, list=15%, signal=71%
GOBP_RRNA_MODIFICATION	39	0.774091	1.99511	0	0.0012553	0.041	3878	tags=62%, list=10%, signal=68%
GOBP_PYRIMIDINE_NUCLEOSIDE_TRIPHOSPHATE_METABOLIC_PROCESS	23	0.797822	1.99283	0	0.00140575	0.043	5217	tags=65%, list=13%, signal=75%
GOBP_REGULATION_OF_TELOMERE_MAINTENANCE_VIA_TELOMERE_LENGTHENING	59	0.712957	1.99167	0	0.00141924	0.044	6411	tags=63%, list=16%, signal=75%
GOBP_DNA_SYNTHESIS_INVOLVED_IN_DNA_REPAIR	52	0.715556	1.99041	0	0.00140423	0.045	4986	tags=62%, list=13%, signal=70%
GOBP_ESTABLISHMENT_OF_MITOTIC_SPINDLE_ORIENTATION	28	0.764351	1.98944	0	0.00137157	0.045	4855	tags=64%, list=12%, signal=73%
GOBP_TRANSCRIPTION_PREINITIATION_COMPLEX_ASSEMBLY	36	0.741293	1.98893	0	0.0013404	0.045	3681	tags=61%, list=9%, signal=67%
GOBP_RNA_LOCALIZATION	231	0.653056	1.98774	0	0.00139375	0.047	7263	tags=63%, list=18%, signal=76%
GOBP_CLEAVAGE_INVOLVED_IN_RRNA_PROCESSING	27	0.845384	1.98719	0	0.00139947	0.047	4880	tags=89%, list=12%, signal=101%
GOBP_TRANSCRIPTION_BY_RNA_POLYMERASE_III	46	0.701267	1.9859	0	0.00139544	0.049	7635	tags=70%, list=19%, signal=86%
GOBP_DNA_TEMPLATED_TRANSCRIPTION_INITIATION	230	0.605974	1.98546	0	0.00140885	0.05	7144	tags=54%, list=18%, signal=65%
GOBP_RIBOSOME_ASSEMBLY	61	0.753091	1.98216	0	0.00153546	0.057	4001	tags=64%, list=10%, signal=71%
GOBP_RNA_SPLICING_VIA_TRANSESTERIFICATION_REACTIONS	380	0.638132	1.98157	0.00199601	0.00152027	0.057	6779	tags=55%, list=17%, signal=66%
