# Supplementary material for: Bevacizumab beyond Progression for Newly Diagnosed Glioblastoma (BIOMARK): Phase II Safety, Efficacy and Biomarker Study
Source: Cancers (Basel). 2022 Nov 10;14(22):5522. doi: 10.3390/cancers14225522 (PMC9688169; doi:10.3390/cancers14225522)
Supplement: Supplementary file 1 [file cancers-14-05522-s001.zip › Nagane et al. Table_S7_final.xlsx]

## Sheet: Supple Table S6
Table S7. Top 50 genes from the Oncogenic Signature Gene sets enriched in Cluster 1 (Molecular Signatures Database v7.4, C6)
GS follow link to MSigDB	SIZE	ES	NES	NOM p-val	FDR q-val	FWER p-val	RANK AT MAX	LEADING EDGE
CSR_LATE_UP.V1_UP	165	0.667791	2.11959	0	0	0	3651	tags=48%, list=9%, signal=53%
RPS14_DN.V1_DN	182	0.60026	1.9375	0.002079	0.00347595	0.008	4702	tags=49%, list=12%, signal=56%
E2F1_UP.V1_UP	186	0.58075	1.86944	0.00616016	0.00543914	0.015	5951	tags=49%, list=15%, signal=57%
RB_P107_DN.V1_UP	127	0.610358	1.8528	0.00603622	0.00519652	0.02	4444	tags=46%, list=11%, signal=51%
MYC_UP.V1_UP	178	0.528823	1.84064	0	0.00516173	0.024	6639	tags=44%, list=17%, signal=52%
GCNP_SHH_UP_EARLY.V1_UP	171	0.55415	1.78717	0.00849257	0.0097544	0.058	7140	tags=53%, list=18%, signal=64%
CAMP_UP.V1_UP	197	0.483539	1.75706	0.00408163	0.0121677	0.08	7737	tags=46%, list=20%, signal=57%
EIF4E_UP	99	0.49037	1.7126	0.00622407	0.0188817	0.117	6736	tags=41%, list=17%, signal=50%
RB_DN.V1_UP	117	0.500225	1.69656	0.00625	0.020001	0.136	6307	tags=44%, list=16%, signal=53%
GCNP_SHH_UP_LATE.V1_UP	181	0.540241	1.68015	0.0169851	0.0219926	0.158	5962	tags=44%, list=15%, signal=52%
GLI1_UP.V1_UP	23	0.60658	1.67649	0.0101626	0.0205787	0.161	6217	tags=57%, list=16%, signal=67%
ESC_J1_UP_LATE.V1_DN	166	0.450054	1.66838	0.00412371	0.0206074	0.173	5700	tags=37%, list=14%, signal=43%
RB_P130_DN.V1_UP	128	0.438091	1.64575	0.00598802	0.0247607	0.209	4650	tags=33%, list=12%, signal=37%
BCAT_GDS748_DN	44	0.512386	1.62822	0.01222	0.0272627	0.237	11805	tags=61%, list=30%, signal=87%
HOXA9_DN.V1_DN	185	0.463312	1.60552	0.0186722	0.0329213	0.276	8885	tags=49%, list=22%, signal=63%
TBK1.DN.48HRS_DN	49	0.495971	1.59393	0.0105932	0.0347968	0.291	4668	tags=39%, list=12%, signal=44%
VEGF_A_UP.V1_DN	191	0.494178	1.5773	0.0425532	0.0381034	0.315	8350	tags=51%, list=21%, signal=65%
PDGF_UP.V1_UP	145	0.458148	1.5726	0.012766	0.0375081	0.322	6389	tags=37%, list=16%, signal=44%
RB_P107_DN.V1_DN	118	0.433042	1.5528	0.0117188	0.0429404	0.351	6742	tags=41%, list=17%, signal=49%
SIRNA_EIF4GI_DN	93	0.469758	1.53231	0.0365112	0.0482379	0.385	7403	tags=39%, list=19%, signal=48%
ERBB2_UP.V1_DN	192	0.470973	1.52572	0.042735	0.0491445	0.4	10829	tags=56%, list=27%, signal=76%
SIRNA_EIF4GI_UP	93	0.459536	1.5224	0.0295359	0.048102	0.407	8822	tags=48%, list=22%, signal=62%
TBK1.DN.48HRS_UP	50	0.503096	1.50346	0.0507099	0.0543472	0.436	9474	tags=58%, list=24%, signal=76%
TBK1.DF_DN	280	0.461946	1.50157	0.0602911	0.0529845	0.442	9092	tags=48%, list=23%, signal=62%
ESC_J1_UP_EARLY.V1_DN	169	0.388769	1.49515	0.0178926	0.0535119	0.45	7227	tags=33%, list=18%, signal=40%
PRC2_EED_UP.V1_DN	189	0.406424	1.44891	0.0569745	0.0739863	0.538	5744	tags=31%, list=15%, signal=36%
PRC2_EZH2_UP.V1_DN	190	0.402439	1.39407	0.0797414	0.106311	0.628	7743	tags=42%, list=20%, signal=51%
AKT_UP_MTOR_DN.V1_DN	183	0.345419	1.35557	0.0327869	0.134006	0.675	5709	tags=27%, list=14%, signal=32%
E2F3_UP.V1_UP	186	0.382678	1.343	0.114754	0.141974	0.693	4462	tags=28%, list=11%, signal=32%
CYCLIN_D1_KE_.V1_UP	186	0.341536	1.33483	0.054326	0.145211	0.712	5623	tags=28%, list=14%, signal=32%
PDGF_ERK_DN.V1_DN	147	0.393958	1.32077	0.126761	0.153187	0.73	7896	tags=42%, list=20%, signal=53%
CSR_EARLY_UP.V1_UP	152	0.433614	1.30619	0.198758	0.16393	0.752	6101	tags=35%, list=15%, signal=41%
CORDENONSI_YAP_CONSERVED_SIGNATURE	55	0.406361	1.30344	0.148297	0.161511	0.755	4592	tags=29%, list=12%, signal=33%
EGFR_UP.V1_DN	178	0.377514	1.27685	0.175325	0.183131	0.794	9630	tags=44%, list=24%, signal=58%
ESC_V6.5_UP_LATE.V1_DN	176	0.325504	1.27292	0.0824524	0.181829	0.798	7208	tags=32%, list=18%, signal=39%
MTOR_UP.N4.V1_UP	191	0.344066	1.25795	0.147992	0.193527	0.813	5694	tags=30%, list=14%, signal=35%
CSR_EARLY_UP.V1_DN	124	0.362203	1.2088	0.21308	0.246426	0.858	5616	tags=30%, list=14%, signal=35%
JAK2_DN.V1_DN	143	0.366393	1.2087	0.245902	0.24002	0.858	10220	tags=45%, list=26%, signal=60%
MTOR_UP.N4.V1_DN	176	0.348737	1.20197	0.247401	0.242061	0.864	7527	tags=37%, list=19%, signal=45%
BCAT_BILD_ET_AL_UP	45	0.373598	1.1793	0.229249	0.266077	0.884	4973	tags=31%, list=13%, signal=36%
SRC_UP.V1_DN	167	0.306668	1.17405	0.190669	0.265879	0.888	5903	tags=26%, list=15%, signal=30%
DCA_UP.V1_DN	182	0.317457	1.17368	0.225873	0.259934	0.888	8491	tags=34%, list=22%, signal=43%
MEK_UP.V1_DN	176	0.344931	1.16556	0.276639	0.263968	0.891	10719	tags=46%, list=27%, signal=63%
RAF_UP.V1_DN	187	0.337555	1.16435	0.247401	0.259481	0.892	9641	tags=41%, list=24%, signal=54%
MTOR_UP.V1_UP	166	0.312079	1.15988	0.231102	0.259702	0.894	6413	tags=30%, list=16%, signal=35%
CAHOY_ASTROCYTIC	100	0.362433	1.15723	0.277083	0.257233	0.896	7724	tags=35%, list=20%, signal=43%
YAP1_UP	45	0.353794	1.15219	0.247544	0.257801	0.899	4471	tags=24%, list=11%, signal=28%
YAP1_DN	47	0.354497	1.12511	0.303983	0.286615	0.911	4375	tags=26%, list=11%, signal=29%
PDGF_ERK_DN.V1_UP	143	0.300074	1.12458	0.279503	0.281306	0.911	7822	tags=34%, list=20%, signal=43%
PGF_UP.V1_UP	185	0.333495	1.09764	0.364224	0.31286	0.93	7528	tags=35%, list=19%, signal=43%
