# Supplementary material for: Bevacizumab beyond Progression for Newly Diagnosed Glioblastoma (BIOMARK): Phase II Safety, Efficacy and Biomarker Study
Source: Cancers (Basel). 2022 Nov 10;14(22):5522. doi: 10.3390/cancers14225522 (PMC9688169; doi:10.3390/cancers14225522)
Supplement: Supplementary file 1 [file cancers-14-05522-s001.zip › Nagane et al. Table_S8_final.xlsx]

## Sheet: Supple Table S7
Table S8. Top 50 genes from the Gene Ontology Biological Process Gene sets enriched in Cluster 2 (Molecular Signatures Database v7.4, C5, BP subset)
GS follow link to MSigDB	SIZE	ES	NES	NOM p-val	FDR q-val	FWER p-val	RANK AT MAX	LEADING EDGE
GOBP_REGULATION_OF_DEFENSE_RESPONSE_TO_BACTERIUM	17	-0.745676	-1.95949	0	0.161809	0.09	2365	tags=41%, list=6%, signal=44%
GOBP_NEGATIVE_REGULATION_OF_LEUKOCYTE_CHEMOTAXIS	18	-0.745087	-1.9103	0	0.208935	0.19	3539	tags=56%, list=9%, signal=61%
GOBP_REGULATION_OF_MACROPHAGE_MIGRATION	39	-0.67231	-1.90904	0	0.141926	0.192	3705	tags=46%, list=9%, signal=51%
GOBP_INTERLEUKIN_4_PRODUCTION	33	-0.736296	-1.90192	0.00199203	0.118013	0.199	3706	tags=48%, list=9%, signal=53%
GOBP_G_PROTEIN_COUPLED_RECEPTOR_SIGNALING_PATHWAY_COUPLED_TO_CYCLIC_NUCLEOTIDE_SECOND_MESSENGER	66	-0.66737	-1.89063	0.00199203	0.118662	0.239	5894	tags=52%, list=15%, signal=60%
GOBP_MACROPHAGE_ACTIVATION	100	-0.665671	-1.89059	0	0.099002	0.239	5974	tags=52%, list=15%, signal=61%
GOBP_REGULATION_OF_MACROPHAGE_CHEMOTAXIS	27	-0.652043	-1.89024	0	0.0852389	0.241	3412	tags=44%, list=9%, signal=49%
GOBP_DEFENSE_RESPONSE_TO_BACTERIUM	326	-0.533121	-1.87241	0.00201207	0.10066	0.291	4510	tags=25%, list=11%, signal=28%
GOBP_RESPONSE_TO_CHEMOKINE	95	-0.681064	-1.86655	0.00606061	0.0997023	0.309	6432	tags=65%, list=16%, signal=78%
GOBP_SEROTONIN_RECEPTOR_SIGNALING_PATHWAY	38	-0.694315	-1.86037	0	0.0989826	0.326	5894	tags=50%, list=15%, signal=59%
GOBP_POSITIVE_REGULATION_OF_ANTIGEN_RECEPTOR_MEDIATED_SIGNALING_PATHWAY	23	-0.745619	-1.85854	0	0.0922115	0.33	3290	tags=52%, list=8%, signal=57%
GOBP_POSITIVE_REGULATION_OF_MACROPHAGE_ACTIVATION	27	-0.763666	-1.85788	0	0.0852595	0.331	5739	tags=59%, list=15%, signal=69%
GOBP_REGULATION_OF_MACROPHAGE_ACTIVATION	57	-0.670688	-1.85615	0	0.0814832	0.338	5739	tags=51%, list=15%, signal=59%
GOBP_REGULATION_OF_MICROGLIAL_CELL_ACTIVATION	19	-0.756092	-1.85379	0	0.0788045	0.345	4932	tags=58%, list=12%, signal=66%
GOBP_MICROGLIAL_CELL_ACTIVATION	46	-0.721933	-1.84548	0.00203252	0.0853187	0.37	6642	tags=61%, list=17%, signal=73%
GOBP_NEGATIVE_REGULATION_OF_ANTIGEN_RECEPTOR_MEDIATED_SIGNALING_PATHWAY	30	-0.724017	-1.84435	0.00393701	0.0810293	0.375	3650	tags=50%, list=9%, signal=55%
GOBP_REGULATION_OF_ANTIGEN_RECEPTOR_MEDIATED_SIGNALING_PATHWAY	66	-0.666347	-1.83534	0.00397614	0.0874154	0.411	3650	tags=45%, list=9%, signal=50%
GOBP_NEUROINFLAMMATORY_RESPONSE	43	-0.674617	-1.83106	0.00595238	0.0878117	0.424	6642	tags=51%, list=17%, signal=61%
GOBP_GASTRIC_ACID_SECRETION	17	-0.675208	-1.82894	0	0.0858673	0.426	6607	tags=47%, list=17%, signal=56%
GOBP_MAST_CELL_ACTIVATION	60	-0.657396	-1.82778	0.00592885	0.0829445	0.431	3777	tags=53%, list=10%, signal=59%
GOBP_INTERLEUKIN_1_BETA_PRODUCTION	108	-0.630439	-1.82487	0.00796813	0.0829073	0.438	5374	tags=44%, list=14%, signal=51%
GOBP_POSITIVE_REGULATION_OF_MACROPHAGE_MIGRATION	24	-0.733521	-1.82235	0.00392927	0.0826246	0.448	3705	tags=58%, list=9%, signal=64%
GOBP_B_CELL_RECEPTOR_SIGNALING_PATHWAY	126	-0.682036	-1.82068	0.00199203	0.0812825	0.452	3197	tags=27%, list=8%, signal=29%
GOBP_REGULATION_OF_ICOSANOID_SECRETION	19	-0.651696	-1.81936	0	0.0794977	0.454	5974	tags=53%, list=15%, signal=62%
GOBP_DETECTION_OF_BIOTIC_STIMULUS	36	-0.681443	-1.81509	0.0059761	0.0814512	0.477	4472	tags=53%, list=11%, signal=59%
GOBP_LEUKOCYTE_CHEMOTAXIS	222	-0.58371	-1.81271	0.00788955	0.0813147	0.487	5893	tags=52%, list=15%, signal=61%
GOBP_MAST_CELL_ACTIVATION_INVOLVED_IN_IMMUNE_RESPONSE	47	-0.640488	-1.81162	0.00395257	0.079539	0.488	3777	tags=53%, list=10%, signal=59%
GOBP_POSITIVE_REGULATION_OF_NEUROINFLAMMATORY_RESPONSE	16	-0.803928	-1.80663	0	0.0828694	0.502	6584	tags=63%, list=17%, signal=75%
GOBP_T_CELL_ACTIVATION_INVOLVED_IN_IMMUNE_RESPONSE	111	-0.622469	-1.80455	0.00608519	0.0825391	0.507	5735	tags=49%, list=15%, signal=57%
GOBP_LIPOXYGENASE_PATHWAY	16	-0.709155	-1.80415	0	0.0803051	0.508	7955	tags=81%, list=20%, signal=102%
GOBP_REGULATION_OF_NEUTROPHIL_CHEMOTAXIS	32	-0.641683	-1.80361	0.00575816	0.0783116	0.509	5739	tags=50%, list=15%, signal=58%
GOBP_GRANULOCYTE_CHEMOTAXIS	122	-0.620654	-1.79924	0.00809717	0.0809229	0.525	5095	tags=53%, list=13%, signal=61%
GOBP_POSITIVE_REGULATION_OF_TISSUE_REMODELING	23	-0.770143	-1.79457	0.00420168	0.0840368	0.541	5233	tags=35%, list=13%, signal=40%
GOBP_POSITIVE_REGULATION_OF_TYPE_2_IMMUNE_RESPONSE	16	-0.771597	-1.79268	0.00409836	0.0839355	0.546	4933	tags=56%, list=12%, signal=64%
GOBP_REGULATION_OF_GRANULOCYTE_CHEMOTAXIS	49	-0.604821	-1.79209	0.00574713	0.0821926	0.547	3539	tags=41%, list=9%, signal=45%
GOBP_POSITIVE_REGULATION_OF_INTERLEUKIN_4_PRODUCTION	24	-0.73901	-1.7896	0.00398406	0.0831777	0.555	3331	tags=54%, list=8%, signal=59%
GOBP_INTERLEUKIN_1_PRODUCTION	126	-0.612546	-1.78946	0.01	0.0810485	0.555	6649	tags=49%, list=17%, signal=59%
GOBP_REGULATION_OF_B_CELL_DIFFERENTIATION	30	-0.696117	-1.78929	0.00201207	0.0792442	0.555	3095	tags=53%, list=8%, signal=58%
GOBP_CELL_CHEMOTAXIS	302	-0.545228	-1.78882	0.00963391	0.0775832	0.556	5110	tags=43%, list=13%, signal=49%
GOBP_ICOSANOID_BIOSYNTHETIC_PROCESS	54	-0.536011	-1.78798	0.00200401	0.0764245	0.559	4850	tags=33%, list=12%, signal=38%
GOBP_REGULATION_OF_LEUKOCYTE_CHEMOTAXIS	118	-0.565318	-1.78734	0.00793651	0.0752829	0.56	4484	tags=44%, list=11%, signal=50%
GOBP_LOW_DENSITY_LIPOPROTEIN_PARTICLE_REMODELING	17	-0.688887	-1.78705	0.00389105	0.073717	0.561	6268	tags=59%, list=16%, signal=70%
GOBP_NEGATIVE_REGULATION_OF_STEROL_TRANSPORT	27	-0.739372	-1.78257	0.00198413	0.0766715	0.583	4503	tags=30%, list=11%, signal=33%
GOBP_NEUTROPHIL_CHEMOTAXIS	101	-0.63873	-1.78207	0.00821355	0.0755498	0.586	5857	tags=59%, list=15%, signal=70%
GOBP_POSITIVE_REGULATION_OF_INTERLEUKIN_10_PRODUCTION	38	-0.682983	-1.77785	0.0100806	0.0784156	0.595	4933	tags=55%, list=12%, signal=63%
GOBP_MYELOID_LEUKOCYTE_MIGRATION	214	-0.575807	-1.77466	0.0100806	0.0802503	0.601	5893	tags=49%, list=15%, signal=57%
GOBP_PHOSPHOLIPID_CATABOLIC_PROCESS	49	-0.53738	-1.77461	0	0.0785578	0.602	5817	tags=37%, list=15%, signal=43%
GOBP_HUMORAL_IMMUNE_RESPONSE	362	-0.522724	-1.77209	0.00622407	0.0801333	0.613	7895	tags=33%, list=20%, signal=41%
GOBP_POSITIVE_REGULATION_OF_INFLAMMATORY_RESPONSE	130	-0.621797	-1.77051	0.00808081	0.0799321	0.614	5974	tags=50%, list=15%, signal=59%
GOBP_ADAPTATION_OF_SIGNALING_PATHWAY	21	-0.641019	-1.76545	0.00398406	0.08428	0.631	4268	tags=48%, list=11%, signal=53%
