# Supplementary material for: Bevacizumab beyond Progression for Newly Diagnosed Glioblastoma (BIOMARK): Phase II Safety, Efficacy and Biomarker Study
Source: Cancers (Basel). 2022 Nov 10;14(22):5522. doi: 10.3390/cancers14225522 (PMC9688169; doi:10.3390/cancers14225522)
Supplement: Supplementary file 1 [file cancers-14-05522-s001.zip › Nagane et al. Table_S9_final.xlsx]

## Sheet: Supple Table S8
Table S9. Top 50 genes from the Oncogenic Signature Gene sets enriched in Cluster 2 (Molecular Signatures Database v7.4, C6)
GS follow link to MSigDB	SIZE	ES	NES	NOM p-val	FDR q-val	FWER p-val	RANK AT MAX	LEADING EDGE
P53_DN.V2_UP	146	-0.520983	-1.79247	0	0.0844511	0.05	5590	tags=42%, list=14%, signal=48%
ALK_DN.V1_UP	139	-0.527353	-1.78453	0	0.0506603	0.054	7039	tags=45%, list=18%, signal=55%
RPS14_DN.V1_UP	189	-0.614138	-1.77715	0.00407332	0.0360706	0.056	5014	tags=48%, list=13%, signal=54%
KRAS.LUNG.BREAST_UP.V1_UP	141	-0.539996	-1.77433	0.00205761	0.0273945	0.057	6861	tags=51%, list=17%, signal=62%
KRAS.LUNG_UP.V1_UP	138	-0.49515	-1.749	0	0.0295463	0.079	6836	tags=47%, list=17%, signal=57%
KRAS.600.LUNG.BREAST_UP.V1_UP	279	-0.459213	-1.7082	0	0.0417045	0.119	6927	tags=42%, list=18%, signal=50%
KRAS.BREAST_UP.V1_UP	136	-0.473382	-1.6927	0	0.0427514	0.135	6649	tags=39%, list=17%, signal=47%
KRAS.600_UP.V1_UP	273	-0.459458	-1.65303	0.00578035	0.0628823	0.199	6927	tags=45%, list=18%, signal=55%
KRAS.300_UP.V1_DN	137	-0.487924	-1.65229	0	0.0558954	0.199	8901	tags=50%, list=23%, signal=65%
RELA_DN.V1_DN	136	-0.456816	-1.65175	0	0.0503831	0.199	4198	tags=32%, list=11%, signal=36%
PRC1_BMI_UP.V1_UP	180	-0.440664	-1.62711	0.00197628	0.0606563	0.224	5408	tags=36%, list=14%, signal=42%
VEGF_A_UP.V1_UP	192	-0.43745	-1.6243	0.0040404	0.0573561	0.227	5614	tags=33%, list=14%, signal=38%
IL21_UP.V1_UP	181	-0.429988	-1.60551	0	0.0641363	0.263	7984	tags=39%, list=20%, signal=49%
ALK_DN.V1_DN	137	-0.46686	-1.59962	0.0117878	0.0627457	0.271	7097	tags=42%, list=18%, signal=51%
HINATA_NFKB_IMMU_INF	15	-0.834848	-1.57866	0.0248092	0.0729334	0.308	4961	tags=93%, list=13%, signal=107%
KRAS.600_UP.V1_DN	273	-0.433325	-1.578	0.00206186	0.0687977	0.309	8096	tags=41%, list=21%, signal=51%
SINGH_KRAS_DEPENDENCY_SIGNATURE	20	-0.611965	-1.5485	0.0287474	0.0869141	0.372	8736	tags=60%, list=22%, signal=77%
KRAS.PROSTATE_UP.V1_DN	141	-0.414414	-1.54625	0.008	0.0837146	0.375	5684	tags=34%, list=14%, signal=40%
PDGF_UP.V1_DN	128	-0.4459	-1.5391	0.0142276	0.0847759	0.383	8946	tags=46%, list=23%, signal=59%
SNF5_DN.V1_DN	156	-0.416807	-1.53458	0.0206186	0.0839973	0.39	5843	tags=37%, list=15%, signal=43%
BRCA1_DN.V1_UP	127	-0.433399	-1.52819	0.012024	0.0841342	0.405	5860	tags=33%, list=15%, signal=39%
ATM_DN.V1_DN	145	-0.416906	-1.52519	0.01002	0.0826845	0.412	6095	tags=35%, list=15%, signal=41%
PTEN_DN.V2_UP	137	-0.428074	-1.52273	0.0235294	0.0808526	0.416	5724	tags=39%, list=14%, signal=45%
KRAS.AMP.LUNG_UP.V1_UP	137	-0.42409	-1.51413	0.0172745	0.0845316	0.434	7707	tags=40%, list=20%, signal=50%
CTIP_DN.V1_UP	132	-0.404803	-1.50546	0.00980392	0.0886944	0.453	6458	tags=36%, list=16%, signal=43%
KRAS.50_UP.V1_UP	48	-0.507253	-1.50519	0.0525253	0.0855701	0.456	7310	tags=58%, list=19%, signal=71%
P53_DN.V1_DN	194	-0.423748	-1.48834	0.0352941	0.0946104	0.487	6783	tags=41%, list=17%, signal=49%
ATF2_S_UP.V1_UP	192	-0.379882	-1.48825	0.00798403	0.0913716	0.487	4064	tags=27%, list=10%, signal=30%
KRAS.BREAST_UP.V1_DN	139	-0.434191	-1.48625	0.0341365	0.0894223	0.491	7422	tags=41%, list=19%, signal=50%
ESC_J1_UP_LATE.V1_UP	180	-0.44203	-1.48359	0.0347648	0.0883092	0.497	6949	tags=38%, list=18%, signal=46%
KRAS.300_UP.V1_UP	141	-0.447662	-1.48184	0.0683594	0.0867213	0.501	7410	tags=49%, list=19%, signal=60%
ATM_DN.V1_UP	145	-0.40097	-1.48154	0.0140281	0.0842505	0.502	6790	tags=37%, list=17%, signal=44%
KRAS.AMP.LUNG_UP.V1_DN	136	-0.402457	-1.47735	0.022541	0.0843628	0.508	5243	tags=32%, list=13%, signal=37%
KRAS.KIDNEY_UP.V1_DN	131	-0.427876	-1.4762	0.0185567	0.0826276	0.51	7028	tags=37%, list=18%, signal=44%
PRC2_EZH2_UP.V1_UP	190	-0.423806	-1.46921	0.0422535	0.0852754	0.525	7608	tags=41%, list=19%, signal=50%
LEF1_UP.V1_DN	184	-0.412257	-1.46918	0.0334646	0.0829269	0.525	4348	tags=28%, list=11%, signal=31%
PRC2_SUZ12_UP.V1_UP	183	-0.397295	-1.46898	0.0261569	0.0807699	0.525	5715	tags=32%, list=14%, signal=38%
BCAT.100_UP.V1_UP	49	-0.453174	-1.46522	0.0245399	0.0806915	0.53	7022	tags=43%, list=18%, signal=52%
IL15_UP.V1_DN	176	-0.408443	-1.45766	0.0246407	0.0838513	0.538	6099	tags=33%, list=15%, signal=39%
CAHOY_NEURONAL	100	-0.688295	-1.45503	0.12253	0.083523	0.541	6118	tags=66%, list=15%, signal=78%
PKCA_DN.V1_UP	156	-0.38099	-1.42984	0.0363985	0.0988534	0.577	8738	tags=44%, list=22%, signal=57%
KRAS.LUNG.BREAST_UP.V1_DN	139	-0.383752	-1.40921	0.0381526	0.111765	0.607	8152	tags=41%, list=21%, signal=51%
KRAS.PROSTATE_UP.V1_UP	135	-0.391872	-1.40875	0.0632184	0.109555	0.608	7787	tags=40%, list=20%, signal=50%
ERBB2_UP.V1_UP	187	-0.376787	-1.39427	0.0574257	0.118558	0.635	6754	tags=36%, list=17%, signal=44%
NOTCH_DN.V1_DN	181	-0.38127	-1.38181	0.0509165	0.12684	0.658	6732	tags=35%, list=17%, signal=42%
KRAS.KIDNEY_UP.V1_UP	141	-0.504293	-1.38057	0.148438	0.125162	0.66	5389	tags=43%, list=14%, signal=49%
KRAS.600.LUNG.BREAST_UP.V1_DN	280	-0.358406	-1.37967	0.0332681	0.12316	0.661	8406	tags=39%, list=21%, signal=49%
PRC2_EED_UP.V1_UP	184	-0.372815	-1.37046	0.0582524	0.128425	0.679	5665	tags=33%, list=14%, signal=39%
ESC_V6.5_UP_EARLY.V1_DN	157	-0.388213	-1.36996	0.0645161	0.126392	0.682	6751	tags=38%, list=17%, signal=45%
EGFR_UP.V1_UP	189	-0.438673	-1.35755	0.138211	0.134862	0.697	5494	tags=37%, list=14%, signal=42%
