# Supplementary material for: Bevacizumab beyond Progression for Newly Diagnosed Glioblastoma (BIOMARK): Phase II Safety, Efficacy and Biomarker Study
Source: Cancers (Basel). 2022 Nov 10;14(22):5522. doi: 10.3390/cancers14225522 (PMC9688169; doi:10.3390/cancers14225522)
Supplement: Supplementary file 1 [file cancers-14-05522-s001.zip › Nagane et al. Table_S10_final.xlsx]

## Sheet: Supple Table S9
Table S10. Details of Gene Set Enrichment Analysis for Genes down-regulated in HUVEC cells by treatment with VEGFA (VEGF_A_UP.V1_DN, http://www.gsea-msigdb.org/gsea/msigdb/cards/VEGF_A_UP.V1_DN)
SYMBOL	RANK IN GENE LIST	RANK METRIC SCORE	RUNNING ES	CORE ENRICHMENT
ARMC6	16	0.875982	0.0162345	Yes
CSE1L	69	0.778844	0.0297076	Yes
NOC2L	102	0.744166	0.0430307	Yes
MAD2L1	138	0.718059	0.0557816	Yes
PGAP1	301	0.651206	0.0640307	Yes
CCDC86	352	0.636919	0.0748584	Yes
BIRC5	443	0.611354	0.0841826	Yes
KIF22	532	0.593194	0.0932127	Yes
BUB1	572	0.582591	0.103288	Yes
CCNB2	574	0.582485	0.114329	Yes
DLGAP5	628	0.571873	0.123844	Yes
CENPA	660	0.567048	0.133828	Yes
EXO1	673	0.564768	0.144252	Yes
YES1	690	0.561933	0.15452	Yes
LMNB1	719	0.55683	0.164386	Yes
PNO1	750	0.551426	0.174099	Yes
ZNF253	754	0.55104	0.184491	Yes
CCNB1	836	0.538345	0.192657	Yes
TMPO	851	0.53558	0.202476	Yes
RFC4	859	0.534547	0.212453	Yes
XRCC4	891	0.529753	0.221728	Yes
RRM2	1148	0.498458	0.224683	Yes
DLEU1	1207	0.492487	0.232563	Yes
PLK4	1307	0.481431	0.23919	Yes
MCM4	1362	0.475846	0.246856	Yes
KIF11	1409	0.471271	0.254639	Yes
CDC45	1502	0.46205	0.261076	Yes
TTK	1564	0.456723	0.2682	Yes
BUB1B	1749	0.439841	0.271874	Yes
CCNE1	1830	0.43233	0.278052	Yes
SLC30A9	1863	0.430051	0.285407	Yes
DBF4	1951	0.422467	0.291219	Yes
POP1	2016	0.417912	0.29753	Yes
NUP155	2061	0.414155	0.304279	Yes
VRK1	2091	0.412023	0.311368	Yes
NDC80	2094	0.411642	0.319138	Yes
LRP8	2095	0.411637	0.326958	Yes
ATIC	2132	0.40931	0.333818	Yes
HIRA	2139	0.409193	0.341439	Yes
CDKN3	2253	0.401149	0.346184	Yes
ORC2	2440	0.388288	0.348828	Yes
NUDT21	2565	0.380195	0.352895	Yes
TMEM259	2614	0.376737	0.358831	Yes
RRS1	2617	0.376446	0.365932	Yes
CEBPZ	2640	0.374735	0.372491	Yes
CNTFR	2685	0.372493	0.378448	Yes
MFAP3	2686	0.372491	0.385524	Yes
NBN	2798	0.366146	0.389656	Yes
RIF1	2812	0.365157	0.396262	Yes
ACADM	2943	0.357875	0.399753	Yes
TFAM	2994	0.354611	0.405217	Yes
RRP12	3041	0.352366	0.410741	Yes
NR2F1	3119	0.348448	0.415401	Yes
MRPL19	3139	0.347824	0.421526	Yes
KIF23	3174	0.346457	0.427243	Yes
PRMT3	3293	0.340559	0.43071	Yes
NUP50	3620	0.323864	0.428567	Yes
ADAM9	3680	0.321206	0.433168	Yes
DNAJC13	3712	0.319255	0.438444	Yes
CTNNAL1	3790	0.314931	0.442468	Yes
NCOA3	3855	0.311936	0.446765	Yes
SPAG5	3968	0.307009	0.449748	Yes
PHKA1	4018	0.304859	0.454293	Yes
PAPOLA	4307	0.291818	0.452508	Yes
IPO5	4376	0.289196	0.456272	Yes
BCLAF1	4511	0.283103	0.45824	Yes
TTC37	4553	0.281792	0.46255	Yes
CENPE	4635	0.278868	0.465787	Yes
POP5	4719	0.275484	0.468909	Yes
DHX29	4830	0.271458	0.471267	Yes
TWF1	4967	0.266557	0.47287	Yes
B4GALT5	5027	0.264687	0.476397	Yes
CBL	5299	0.254542	0.474337	Yes
MKLN1	5390	0.251704	0.476829	Yes
STIP1	5451	0.249946	0.48005	Yes
PNN	5603	0.244565	0.480854	Yes
MAP3K7	5782	0.238887	0.480863	Yes
SACS	5974	0.23169	0.480405	Yes
HMMR	6034	0.229753	0.483268	Yes
MAPK6	6246	0.223497	0.482145	Yes
RP2	6284	0.222759	0.485435	Yes
RECQL	6417	0.218565	0.486229	Yes
CEP170	6855	0.206164	0.479025	Yes
LRRC17	6893	0.205169	0.481982	Yes
SCAF11	7157	0.198391	0.479058	Yes
INHBB	7208	0.196968	0.481528	Yes
TRMU	7229	0.196596	0.484754	Yes
ITGB3	7453	0.190924	0.482706	Yes
CCNH	7594	0.187559	0.482707	Yes
CKS2	7683	0.185495	0.483992	Yes
PTPRD	7743	0.184019	0.485987	Yes
DHFR	7744	0.183981	0.489482	Yes
SETBP1	7758	0.183382	0.492635	Yes
BAK1	7919	0.179705	0.491978	Yes
AIMP1	8127	0.175263	0.49004	Yes
EIF2S3	8305	0.171399	0.488792	Yes
UGP2	8345	0.170591	0.49104	Yes
TRIM25	8350	0.170499	0.494178	Yes
ACE	8742	0.162048	0.487307	No
AASS	9464	0.147264	0.471758	No
MEST	9597	0.14479	0.47115	No
CDC27	9979	0.13712	0.46406	No
SMC4	10486	0.126853	0.453594	No
USP13	10712	0.12258	0.450198	No
MPHOSPH6	10887	0.119297	0.448036	No
ATP13A3	11359	0.109421	0.43813	No
TRAPPC8	11413	0.108439	0.438842	No
RGS5	11568	0.105337	0.436924	No
PUM3	11574	0.105249	0.438796	No
MDN1	11752	0.101427	0.436219	No
PRPF40A	12127	0.0947915	0.428503	No
CEP131	12216	0.0929433	0.42803	No
TLE3	12326	0.0910654	0.426986	No
CRYZ	12364	0.0901706	0.427758	No
ZNF124	12766	0.0829003	0.419129	No
UCHL3	12928	0.0802859	0.416557	No
PCDH7	13105	0.0771273	0.413544	No
VEGFC	13383	0.0723837	0.407871	No
ANGPT2	13993	0.061516	0.393543	No
SEL1L	14154	0.0588716	0.39059	No
BCL10	14479	0.0533613	0.383359	No
RDH11	15313	0.0403152	0.362928	No
MT1X	15815	0.0328658	0.350804	No
ASPH	17551	0.00895517	0.306826	No
AMD1	23056	-0.00480888	0.166863	No
CYB561D2	23171	-0.00601941	0.164076	No
MMP14	23345	-0.00834372	0.159833	No
MMRN1	23401	-0.00928056	0.158609	No
RAB3B	23619	-0.0121134	0.153318	No
PTPRE	24818	-0.0287508	0.12338	No
CHM	24829	-0.0289627	0.123675	No
EPM2AIP1	25305	-0.0353998	0.112261	No
AQP8	25853	-0.0435828	0.0991702	No
KLF9	26066	-0.0468458	0.0946657	No
UAP1	26111	-0.0474985	0.0944484	No
NRP1	26252	-0.0498035	0.0918321	No
DDX21	26521	-0.0543219	0.0860446	No
MBD4	26564	-0.0550872	0.0860224	No
GPR4	27036	-0.0628077	0.0752306	No
STEAP1	27112	-0.0641037	0.0745399	No
MYO5A	27212	-0.0656619	0.0732682	No
ZNF117	27728	-0.0743711	0.0615764	No
RASA2	27945	-0.0779827	0.0575616	No
RPGR	28647	-0.0903983	0.0414414	No
ZC3H15	28879	-0.0946531	0.0373615	No
SULT1B1	30314	-0.123757	0.00322316	No
FKBP5	30316	-0.123765	0.00554895	No
ADTRP	30361	-0.124832	0.00680085	No
GABBR2	30491	-0.128041	0.00595081	No
THOC2	30987	-0.139404	-0.00399657	No
TNP1	31029	-0.140033	-0.00237955	No
GATA6	31036	-0.140101	0.000129371	No
CPA3	31201	-0.143831	-0.0013113	No
FLT1	31339	-0.147104	-0.00200275	No
ATP8B3	31754	-0.156685	-0.00956071	No
UFL1	31763	-0.157026	-0.00678115	No
RAP1A	32111	-0.165609	-0.0124647	No
ARHGAP29	32112	-0.165614	-0.00931843	No
RND3	32547	-0.175931	-0.0170197	No
GPR37	32567	-0.176674	-0.0141468	No
ITGA2	32903	-0.184724	-0.0191618	No
BAZ1A	32940	-0.185591	-0.0165521	No
SLC7A2	32954	-0.186018	-0.0133489	No
DKK1	33268	-0.194063	-0.0176268	No
PRKACB	33789	-0.208344	-0.0269006	No
SERPINB2	34143	-0.218299	-0.0317359	No
NEK7	34251	-0.221832	-0.0302443	No
AMPH	34388	-0.226138	-0.0294089	No
RNF6	34721	-0.236912	-0.0333561	No
SLC4A7	34854	-0.241621	-0.0321248	No
ROM1	35012	-0.247116	-0.0314251	No
SPTLC2	35224	-0.255166	-0.0319467	No
IL6	35240	-0.25553	-0.0274739	No
CACNA2D1	35252	-0.256062	-0.0228892	No
PSD3	35309	-0.258041	-0.019412	No
IL1RL1	35437	-0.262859	-0.0176499	No
TSPAN8	36414	-0.302896	-0.0367308	No
TGFBI	36440	-0.304213	-0.0315876	No
PPIG	36942	-0.328961	-0.0380866	No
CCL23	37147	-0.340259	-0.0368134	No
LRRFIP1	37332	-0.349331	-0.034859	No
RGS2	37454	-0.35583	-0.031178	No
CD8B	37794	-0.377046	-0.0326411	No
PLCL1	37845	-0.380757	-0.0266799	No
RGS4	38320	-0.414813	-0.0308608	No
CDC42EP2	38628	-0.443944	-0.0302388	No
MAFK	38633	-0.444148	-0.0219028	No
SAT1	38801	-0.463778	-0.0173416	No
FABP4	39311	-0.592167	-0.0190438	No
MAP1B	39340	-0.603531	-0.00829056	No
OSTF1	39380	-0.634611	0.00277318	No
