# Supplementary material for: Bevacizumab beyond Progression for Newly Diagnosed Glioblastoma (BIOMARK): Phase II Safety, Efficacy and Biomarker Study
Source: Cancers (Basel). 2022 Nov 10;14(22):5522. doi: 10.3390/cancers14225522 (PMC9688169; doi:10.3390/cancers14225522)
Supplement: Supplementary file 1 [file cancers-14-05522-s001.zip › Nagane et al. Table_S11_final.xlsx]

## Sheet: Supple Table S10
Table S11. Details of Gene Set Enrichment Analysis for Genes up-regulated in HUVEC cells by treatment with VEGFA (VEGF_A_UP.V1_UP, http://www.gsea-msigdb.org/gsea/msigdb/cards/VEGF_A_UP.V1_UP)
SYMBOL	RANK IN GENE LIST	RANK METRIC SCORE	RUNNING ES	CORE ENRICHMENT
CLIP2	680	0.563778	-0.00317565	No
MMP2	1024	0.513481	0.000963764	No
HMCES	1807	0.4339	-0.00806213	No
CCDC22	2196	0.405234	-0.00778044	No
RMND5B	2518	0.383122	-0.00634793	No
DCX	2606	0.377339	0.000894151	No
ABCB10	2936	0.358293	0.00150088	No
GDF11	3496	0.330011	-0.00445384	No
CORO2B	3907	0.309629	-0.00712776	No
FPGS	3921	0.308942	0.00028338	No
TMEM8B	3939	0.307872	0.00756591	No
CRYGD	4014	0.304954	0.0133249	No
COL11A2	4423	0.287314	0.0101426	No
DSG2	4595	0.280174	0.0128123	No
HTT	4855	0.270702	0.0130053	No
TRAF5	4868	0.270182	0.0194706	No
CIC	5431	0.250555	0.0114484	No
HSD11B2	6234	0.223895	-0.00334909	No
CHRNA1	6526	0.215703	-0.00534862	No
PSMB8	6573	0.214175	-0.00115204	No
FEV	6617	0.212712	0.00308423	No
PKD1	6866	0.205861	0.00193226	No
LHX2	6894	0.205128	0.00638562	No
MN1	7588	0.187748	-0.006544	No
PPFIA4	7712	0.184791	-0.00504315	No
KMT2D	8046	0.177352	-0.0090725	No
CXCL11	8483	0.16812	-0.0159542	No
SEMA5A	8578	0.166007	-0.0141861	No
IFT140	8586	0.165844	-0.0102083	No
MGAT5	8644	0.164466	-0.00753729	No
MTMR11	8943	0.158026	-0.0111603	No
RHBDD3	9038	0.156351	-0.00963421	No
UBE2L6	9052	0.156078	-0.00605378	No
RFNG	9059	0.155989	-0.00229743	No
TCEA2	9062	0.155895	0.00155833	No
ARC	9063	0.155894	0.00546497	No
PPP6R2	9312	0.150518	0.00292612	No
ETV2	9478	0.146986	0.00241084	No
LONP2	10137	0.13399	-0.0109753	No
TP53I11	10792	0.121014	-0.0245848	No
MATN2	10829	0.120369	-0.0224845	No
EVX1	10938	0.118223	-0.0222701	No
TUB	11421	0.108333	-0.0318206	No
RGS3	11493	0.106983	-0.0309463	No
DTX4	11627	0.104163	-0.0317205	No
ZC3H7B	11950	0.0980674	-0.0374567	No
IRF9	12066	0.0960144	-0.037977	No
SHC2	12195	0.0933359	-0.0388952	No
ITM2A	12236	0.0926372	-0.0375916	No
SH3BP2	12325	0.0910989	-0.037548	No
ZNF205	12395	0.089559	-0.0370595	No
ADORA2A	12975	0.0794135	-0.0498031	No
TKTL1	13128	0.0767517	-0.0517476	No
DYRK1B	13134	0.0766739	-0.0499534	No
PTGFR	13506	0.0699786	-0.0576405	No
SUPT6H	13973	0.0618293	-0.0679491	No
OR7E24	15096	0.0436005	-0.0954076	No
NEDD9	15221	0.0415313	-0.0975222	No
CALCOCO1	15507	0.0370669	-0.103846	No
ZNF76	15722	0.0340435	-0.108438	No
AKAP3	15833	0.0325943	-0.11042	No
PHLDA1	15855	0.0321421	-0.110149	No
KCNMB1	16380	0.0245496	-0.122868	No
CRYGC	16463	0.0232681	-0.124372	No
SMG6	16914	0.0168498	-0.1354	No
RBMX2	17216	0.012897	-0.142737	No
FAM189A2	17343	0.0112199	-0.145662	No
DDIT4	17576	0.00852973	-0.151352	No
PER2	18060	0.00124218	-0.163611	No
CSHL1	18154	0	-0.165978	No
ETFB	22835	-0.00188158	-0.285021	No
SLC22A2	22850	-0.00199492	-0.285327	No
SLC12A2	23035	-0.00456433	-0.289895	No
DUSP8	23253	-0.00721786	-0.295236	No
TM7SF2	23745	-0.0139153	-0.307381	No
PIN4	23795	-0.0143401	-0.308269	No
RAB40AL	23818	-0.0146352	-0.308462	No
CD19	24212	-0.0204094	-0.317951	No
TNS2	24607	-0.0258118	-0.32733	No
MIA	24720	-0.0271866	-0.329499	No
LCAT	24885	-0.0295529	-0.332931	No
IQCK	24907	-0.0299823	-0.332714	No
CLCN6	25231	-0.0341957	-0.340077	No
OPRD1	25410	-0.0370216	-0.343678	No
ATF3	25457	-0.0376623	-0.343905	No
HSD17B8	25557	-0.0393861	-0.345437	No
BMP8A	25617	-0.0401084	-0.345934	No
CCS	25744	-0.0420477	-0.348086	No
CLIP3	25860	-0.0436954	-0.349918	No
NAT8	25887	-0.0440936	-0.349474	No
THY1	26236	-0.0494381	-0.357091	No
ZCCHC24	26599	-0.0556741	-0.364907	No
TXNIP	26719	-0.0576908	-0.36649	No
MTSS1	26750	-0.0581159	-0.365797	No
HOXB5	26977	-0.0619254	-0.369996	No
LY6E	27178	-0.0651478	-0.373453	No
ENO2	27312	-0.0674102	-0.375148	No
GRIK2	27544	-0.0713664	-0.379237	No
FBP2	27617	-0.0725795	-0.379251	No
ENO3	28084	-0.0804981	-0.389092	No
EMILIN1	28766	-0.0925262	-0.404102	No
DDIT3	28859	-0.0943703	-0.404078	No
PAX1	28938	-0.0959523	-0.403659	No
CCDC57	29026	-0.0975742	-0.403427	No
HDAC5	29463	-0.106272	-0.411859	No
ID2	29536	-0.107589	-0.410995	No
ALDOB	29652	-0.109726	-0.411172	No
AMOT	29686	-0.110443	-0.409244	No
ECM1	29751	-0.111655	-0.408074	No
IRS2	29791	-0.112558	-0.406246	No
PTPRJ	29841	-0.113659	-0.404645	No
ABHD3	29907	-0.114936	-0.403418	No
HS3ST1	29920	-0.115154	-0.400838	No
SDC4	30035	-0.117661	-0.40079	No
FMO5	30274	-0.123082	-0.403762	No
KANK3	30342	-0.124352	-0.402351	No
DBH	30571	-0.129651	-0.404904	No
UBA7	31006	-0.139701	-0.412447	No
FGA	31704	-0.155339	-0.42629	No
PPL	31807	-0.158174	-0.424922	No
ARL4C	31883	-0.160039	-0.42282	No
GLI1	32059	-0.164452	-0.423152	No
COLQ	32466	-0.174188	-0.429119	No
NFKBIE	32519	-0.175456	-0.426045	No
ISG20	32630	-0.178084	-0.424381	No
ME3	32701	-0.179806	-0.421657	No
SPINK2	32756	-0.18099	-0.418495	No
RFPL1	33038	-0.187946	-0.420936	No
CACNB1	33152	-0.190922	-0.419027	No
ADARB1	33877	-0.210575	-0.432173	Yes
ABCA4	33962	-0.213223	-0.428968	Yes
TAGLN	33972	-0.213336	-0.423851	Yes
ZNRF4	34036	-0.21539	-0.420056	Yes
TNNC2	34043	-0.215531	-0.414808	Yes
CPA1	34047	-0.215655	-0.40948	Yes
ITIH4	34116	-0.217613	-0.405757	Yes
RELB	34248	-0.22155	-0.403539	Yes
PYY	34527	-0.230799	-0.404829	Yes
CD79A	34629	-0.233845	-0.401539	Yes
FKBP6	34680	-0.235454	-0.396911	Yes
LYRM9	34727	-0.237081	-0.39214	Yes
LMOD1	34882	-0.242319	-0.389987	Yes
PLTP	34956	-0.245141	-0.385701	Yes
AKR1B10	35097	-0.250275	-0.382992	Yes
JCAD	35222	-0.255121	-0.379754	Yes
AKAP5	35674	-0.271282	-0.384432	Yes
CD5	35706	-0.272141	-0.378401	Yes
OVOL1	35773	-0.274393	-0.373205	Yes
MERTK	35870	-0.278755	-0.368662	Yes
SHH	35891	-0.279541	-0.362166	Yes
TPTEP1	36072	-0.287559	-0.35954	Yes
SERPINA3	36100	-0.288964	-0.352986	Yes
EPHX1	36277	-0.296738	-0.350028	Yes
FMO4	36356	-0.300274	-0.344488	Yes
CABP1	36383	-0.301709	-0.337589	Yes
TCL1A	36409	-0.302788	-0.330638	Yes
NINJ1	36682	-0.315514	-0.329653	Yes
FCGR2B	36745	-0.318555	-0.323248	Yes
KCNC3	37176	-0.341042	-0.325643	Yes
INPP5J	37194	-0.341687	-0.317513	Yes
NCF2	37265	-0.345298	-0.310642	Yes
APOBEC3G	37406	-0.353122	-0.305355	Yes
GUCY2D	37479	-0.357411	-0.298231	Yes
IL32	37481	-0.357496	-0.289297	Yes
CCL7	37523	-0.360055	-0.281318	Yes
HTR2A	37599	-0.365959	-0.274056	Yes
NFKB2	37634	-0.367753	-0.265705	Yes
ENPP2	37678	-0.369826	-0.257532	Yes
MYL9	37743	-0.373942	-0.249789	Yes
PART1	38020	-0.393804	-0.246944	Yes
MYO1A	38036	-0.39456	-0.237438	Yes
GABRA5	38132	-0.400782	-0.229812	Yes
ITGB4	38231	-0.407108	-0.222104	Yes
P2RX4	38233	-0.407286	-0.211923	Yes
LTB	38529	-0.432845	-0.208583	Yes
CAMP	38559	-0.436226	-0.198389	Yes
DLG2	38765	-0.459444	-0.192092	Yes
PLA2G4C	38769	-0.459997	-0.180641	Yes
SPOCK3	38793	-0.463015	-0.169624	Yes
ICAM1	38845	-0.470964	-0.159119	Yes
PTPRC	39014	-0.505115	-0.150736	Yes
TNFSF12	39076	-0.518832	-0.139287	Yes
TRAF1	39081	-0.520363	-0.126349	Yes
TLL2	39107	-0.527014	-0.113778	Yes
NKG7	39137	-0.532872	-0.101163	Yes
HLA-DMA	39217	-0.557756	-0.0891957	Yes
CCL2	39296	-0.587537	-0.0764571	Yes
KIAA0930	39300	-0.588636	-0.0617825	Yes
OPTN	39356	-0.615307	-0.0477628	Yes
MYO1F	39373	-0.629389	-0.0323977	Yes
DENND3	39419	-0.668217	-0.0167976	Yes
IRF5	39473	-0.740384	0.000407389	Yes
