# Supplementary material for: Bevacizumab beyond Progression for Newly Diagnosed Glioblastoma (BIOMARK): Phase II Safety, Efficacy and Biomarker Study
Source: Cancers (Basel). 2022 Nov 10;14(22):5522. doi: 10.3390/cancers14225522 (PMC9688169; doi:10.3390/cancers14225522)
Supplement: Supplementary file 1 [file cancers-14-05522-s001.zip › Nagane et al. Table_S12_final.xlsx]

## Sheet: Supple Table S11
Table S12. Frequency of mutations and copy number alterations
Gene alterations	Priority 1		ANP		BBP		Cluster 1		Cluster 2
	n	%	n	%	n	%	n	%	n	%
TERT mut	60	0.769231	15	0.681818	23	0.884615	23	0.766667	21	0.724138
MGMT methylation	23	0.294872	13	0.590909	4	0.153846	7	0.233333	9	0.310345
TP53 mut	26	0.333333	11	0.5	8	0.307692	8	0.266667	15	0.517241
RB1 mut	3	0.0384615	1	0.0454545	1	0.0384615	2	0.0666667	0	0
EGFR mut	7	0.0897436	3	0.136364	3	0.115385	2	0.0666667	1	0.0344828
PDGFRA mut	9	0.115385	6	0.272727	2	0.0769231	3	0.1	2	0.0689655
PIK3CA mut	5	0.0641026	3	0.136364	1	0.0384615	2	0.0666667	0	0
NF1 mut	7	0.0897436	0	0	5	0.192308	2	0.0666667	2	0.0689655
PTEN (mut+HD)	22	0.282051	5	0.227273	9	0.346154	11	0.366667	9	0.310345
RB1 pathway	52	0.666667	15	0.681818	19	0.730769	25	0.833333	16	0.551724
p53 pathway	64	0.820513	22	1	22	0.846154	28	0.933333	22	0.758621
RTK/PI3K pathway	59	0.75641	18	0.818182	23	0.884615	25	0.833333	20	0.689655
Trisomy 7	51	0.653846	16	0.727273	16	0.615385	19	0.633333	17	0.586207
Monosomy 10	51	0.653846	11	0.5	19	0.730769	21	0.7	18	0.62069
Trisomy 19	20	0.25641	6	0.272727	10	0.384615	10	0.333333	3	0.103448
Trisomy 20	22	0.282051	8	0.363636	8	0.307692	12	0.4	2	0.0689655
MDM4 amp	3	0.0384615	1	0.0454545	2	0.0769231	1	0.0333333	0	0
PDGFRA amp	5	0.0641026	3	0.136364	2	0.0769231	2	0.0666667	3	0.103448
EGFR amp	22	0.282051	8	0.363636	7	0.269231	10	0.333333	7	0.241379
MET amp	4	0.0512821	1	0.0454545	1	0.0384615	2	0.0666667	2	0.0689655
CDKN2A HD	43	0.551282	15	0.681818	16	0.615385	21	0.7	12	0.413793
CDK4 amp	11	0.141026	0	0	5	0.192308	5	0.166667	5	0.172414
MDM2 amp	4	0.0512821	0	0	2	0.0769231	2	0.0666667	1	0.0344828
Total number	78		22		26		30		29
mut, mutation; HD, homozygous deletion; amp, amplification; RB1 pathway, either CDKN2A HD, RB1 mut or CDK4 amp; p53 pathway, either TP53 mut, CDKN2A/p14ARF HD, MDM2 amp or MDM4 amp
